# Supplementary material
Source: publisher figshare collection journal article supplement (https://acs.figshare.com/ndownloader/files/4492528)
Supplement: Supplementary file 1 [file 4492528]

Supporting Information for

**Weakly Bound Carbon-Carbon Bonds
in Acenaphthene Derivatives and Hexaphenylethane**

Enoch. Dames, Baptiste Sirjean, and Hai Wang*

*Department of Aerospace and Mechanical Engineering, University of Southern California, Los Angeles, CA 90089-1453, USA*

[**Table S1.** Optimized geometries (in XYZ format) and vibrational frequencies for target species at the B3LYP/6-31G(d) level of theory. 2](#__RefHeading___Toc238036762)

[**Table S2.** Optimized geometries (in XYZ format) for target species at the M06-2X/6-31+G(d,p) level of theory. 59](#__RefHeading___Toc238036763)

[**Table S3.** Optimized geometries (in XYZ format) and vibrational frequencies for reference species at the B3LYP/6-31G(d) level of theory. 73](#__RefHeading___Toc238036764)

[**Table S4.** Optimized geometries (in XYZ format) and vibrational frequencies for reference species at the M06-2X/6-31+G(d,p) level of theory. 93](#__RefHeading___Toc238036765)

### Table S1. Optimized geometries (in XYZ format) and vibrational frequencies for target species at the B3LYP/6-31G(d) level of theory.

C18H14 (**1**)

C 0.00000000 0.00000000 0.00000000

C 1.03564700 -1.03594300 0.43846800

C 2.21598700 -0.37567600 0.83715000

C 2.11250300 1.02926700 0.74513000

C 0.72313600 1.38441400 0.24704400

H 0.17200800 1.98147600 0.98337100

H 0.75738300 1.97971900 -0.67345100

C 3.19733100 1.79855300 1.10309900

C 4.38073600 1.14829000 1.55337300

C 4.47986100 -0.22808000 1.64614000

C 3.37768300 -1.04947100 1.28282600

C 3.30662000 -2.46902000 1.31497600

C 2.14734400 -3.11631500 0.92644900

C 0.99343100 -2.41179300 0.48346700

H 0.10204900 -2.96275700 0.19489600

H 2.11175200 -4.20245500 0.95921500

H 4.16679200 -3.04498900 1.64795600

H 5.40124000 -0.68574600 1.99820000

H 5.23452800 1.75947600 1.83512100

H 3.16829900 2.88435000 1.05326100

C -1.34399800 -0.13463100 0.69905600

C -2.52137400 -0.28359300 -0.04238400

C -3.76054000 -0.40717900 0.59080800

C -3.83926700 -0.38395600 1.98256700

C -2.67080000 -0.23500100 2.73472900

C -1.43649600 -0.11335700 2.09910400

H -0.53336900 -0.00827400 2.69599900

H -2.72128100 -0.21698300 3.82044300

H -4.80112600 -0.48187300 2.47896000

H -4.66146900 -0.52252000 -0.00630800

H -2.46731000 -0.30484600 -1.12876000

H -0.17916100 -0.11415000 -1.07686900

Mode Frequency (cm-1)

1 31.22

2 68.96

3 163.50

4 167.35

5 213.42

6 242.80

7 258.27

8 283.90

9 417.59

10 434.98

11 454.67

12 459.24

13 479.55

14 518.90

15 537.85

16 552.43

17 570.54

18 624.05

19 630.65

20 644.47

21 659.28

22 703.13

23 716.38

24 766.18

25 772.45

26 777.26

27 802.48

28 816.49

29 843.06

30 858.02

31 873.28

32 891.68

33 915.26

34 921.61

35 956.76

36 964.49

37 966.86

38 973.90

39 991.13

40 998.87

41 1016.25

42 1019.83

43 1045.57

44 1063.31

45 1075.09

46 1111.79

47 1119.34

48 1181.64

49 1192.35

50 1193.23

51 1208.38

52 1225.90

53 1233.09

54 1240.17

55 1256.88

56 1263.53

57 1280.83

58 1309.01

59 1314.61

60 1370.02

61 1394.94

62 1399.01

63 1404.59

64 1466.04

65 1480.60

66 1499.70

67 1508.72

68 1516.67

69 1548.71

70 1550.13

71 1644.81

72 1649.76

73 1654.41

74 1667.63

75 1676.30

76 3047.18

77 3057.82

78 3090.33

79 3178.81

80 3179.86

81 3180.14

82 3184.64

83 3189.01

84 3191.36

85 3192.49

86 3200.52

87 3202.24

88 3204.29

89 3211.75

C18H14 

C 0.00000000 0.00000000 0.00000000

C 1.09531500 -0.88912000 0.25556100

C 2.45457200 -0.40835000 0.38829800

C 2.80864400 0.99122900 0.63190200

C 1.92486800 1.97374200 1.07969200

H 0.90741400 1.76555700 1.38029100

H 2.28722300 2.98596100 1.23484600

C 4.18340100 1.36371700 0.50151900

C 5.19161300 0.42807200 0.31031500

C 4.87801400 -0.92218000 0.25058200

C 3.52491700 -1.35936200 0.29345500

C 3.24171200 -2.74776800 0.23008100

C 1.93555200 -3.20215200 0.22514800

C 0.88076400 -2.28896300 0.22043900

H -0.13097500 -2.65348300 0.08867000

H 1.72484600 -4.26693800 0.17065800

H 4.07390800 -3.44533600 0.17840400

H 5.66190200 -1.66877800 0.15465400

H 6.22694300 0.75197700 0.24601200

H 4.43672500 2.41342500 0.62153300

C -1.40682300 -0.21133200 0.20701400

C -2.32958900 0.60012700 -0.50486900

C -3.70011700 0.45271800 -0.34248400

C -4.20708100 -0.49742500 0.55146800

C -3.31817200 -1.28616700 1.29013800

C -1.94498400 -1.14757400 1.12850900

H -1.27162400 -1.73698600 1.74199400

H -3.70140900 -2.00679700 2.00817400

H -5.27963100 -0.61155700 0.68104800

H -4.38034100 1.07942800 -0.91371200

H -1.94399700 1.34023000 -1.20226000

H 0.25525600 0.93780500 -0.48574700

Mode Frequency (cm-1)

1 39.89

2 57.40

3 72.56

4 126.74

5 158.58

6 174.92

7 220.34

8 245.98

9 272.42

10 337.62

11 363.24

12 418.71

13 453.91

14 465.43

15 473.34

16 502.15

17 503.22

18 519.84

19 557.20

20 568.97

21 598.71

22 614.73

23 627.75

24 639.13

25 701.33

26 725.64

27 740.41

28 756.28

29 766.43

30 777.29

31 793.47

32 822.34

33 828.49

34 847.60

35 851.61

36 863.94

37 865.38

38 899.65

39 920.86

40 955.83

41 964.03

42 970.58

43 976.85

44 992.67

45 1005.13

46 1039.88

47 1055.35

48 1084.38

49 1115.54

50 1141.49

51 1154.01

52 1188.70

53 1198.28

54 1203.54

55 1213.85

56 1236.31

57 1250.93

58 1255.88

59 1303.89

60 1337.08

61 1359.29

62 1367.56

63 1374.06

64 1394.17

65 1452.83

66 1463.21

67 1472.37

68 1507.59

69 1524.58

70 1527.68

71 1538.61

72 1566.89

73 1590.91

74 1609.79

75 1610.37

76 1635.22

77 3179.62

78 3181.29

79 3181.76

80 3184.92

81 3186.60

82 3189.34

83 3196.51

84 3198.96

85 3201.01

86 3209.23

87 3212.77

88 3220.43

89 3233.35

90 3284.91

C24H18 (**2**)

C 0.00000000 0.00000000 0.00000000

C -1.47117100 -0.38567700 0.09984600

C -2.25092300 0.61761900 -0.51348700

C -1.46685300 1.61694000 -1.12713700

C 0.00404000 1.22854600 -1.02208700

C 0.96403800 2.33680000 -0.63636700

C 2.19431700 2.47112700 -1.29210700

C 3.10117300 3.46525500 -0.91947400

C 2.78865200 4.34442400 0.11753600

C 1.56405800 4.22191800 0.77845100

C 0.66117200 3.22806800 0.40400100

H -0.29462900 3.14657400 0.91528500

H 1.30899100 4.90547600 1.58425200

H 3.49159600 5.12071900 0.40792500

H 4.05006400 3.55277900 -1.44244000

H 2.44453900 1.78712700 -2.09984800

H 0.32360100 0.83343900 -1.99567000

C -2.10002000 2.67669000 -1.73818100

C -3.52269400 2.71663400 -1.73518700

C -4.29128600 1.72488300 -1.15280500

C -3.66568900 0.61993100 -0.51227400

C -4.29465600 -0.48284800 0.12875700

C -3.53032200 -1.47980400 0.70779700

C -2.10715500 -1.44477500 0.70858300

H -1.54773300 -2.24506000 1.18538200

H -4.02927300 -2.31865800 1.18645200

H -5.38017000 -0.54117100 0.15986700

H -5.37635900 1.79046500 -1.18024300

H -4.01900200 3.55688400 -2.21432300

H -1.53947800 3.47446600 -2.21806100

C 0.96721700 -1.10504300 -0.37893400

C 2.21602700 -1.19436100 0.24932300

C 3.13854200 -2.17364200 -0.12329000

C 2.82303400 -3.08420300 -1.13204800

C 1.57984800 -3.00838900 -1.76401900

C 0.66103300 -2.02822100 -1.39034200

H -0.30779800 -1.98264700 -1.88110900

H 1.32283200 -3.71726500 -2.54704600

H 3.53913800 -3.84828600 -1.42290500

H 4.10206500 -2.22585000 0.37716600

H 2.46794300 -0.48627600 1.03533800

H 0.31288400 0.39789200 0.97477300

Mode Frequency (cm-1)

1 30.97

2 40.09

3 50.99

4 59.07

5 69.86

6 77.98

7 167.68

8 172.23

9 227.62

10 230.72

11 236.89

12 256.87

13 278.13

14 279.04

15 420.54

16 421.49

17 447.56

18 448.86

19 464.42

20 481.32

21 512.36

22 522.70

23 527.89

24 554.30

25 598.81

26 625.83

27 630.81

28 631.84

29 640.38

30 645.98

31 683.73

32 719.73

33 720.96

34 750.66

35 764.43

36 768.57

37 784.06

38 794.48

39 818.19

40 818.61

41 859.96

42 865.16

43 867.41

44 869.56

45 903.16

46 908.13

47 915.99

48 920.96

49 941.77

50 967.67

51 972.75

52 974.46

53 975.69

54 977.17

55 999.71

56 1001.58

57 1018.00

58 1019.12

59 1020.91

60 1046.17

61 1061.89

62 1062.06

63 1076.72

64 1108.41

65 1116.07

66 1121.30

67 1188.80

68 1198.00

69 1198.15

70 1203.21

71 1216.94

72 1217.41

73 1220.63

74 1230.21

75 1236.23

76 1257.26

77 1260.14

78 1268.14

79 1284.36

80 1312.33

81 1316.22

82 1366.79

83 1368.38

84 1383.14

85 1387.38

86 1391.68

87 1402.30

88 1465.06

89 1475.62

90 1505.01

91 1506.84

92 1515.98

93 1546.82

94 1547.70

95 1549.04

96 1645.02

97 1645.31

98 1647.81

99 1653.59

100 1665.71

101 1666.48

102 1674.64

103 3032.60

104 3042.32

105 3179.27

106 3180.43

107 3180.65

108 3181.00

109 3185.80

110 3186.43

111 3192.98

112 3193.96

113 3195.66

114 3195.79

115 3202.19

116 3202.75

117 3205.21

118 3206.29

119 3212.80

120 3213.17

C24H18 

C 0.00000000 0.00000000 0.00000000

C -0.08959800 1.39289700 0.32163100

C -1.36528300 2.07530200 0.47380200

C -2.64069100 1.39269100 0.62618300

C -2.73000500 -0.00022200 0.94863100

C -3.82564100 -0.90971300 0.74519500

C -3.85691400 -2.11650800 1.49277800

C -4.87132600 -3.04911300 1.32369800

C -5.88866900 -2.82499300 0.38904600

C -5.86428600 -1.65772400 -0.38166600

C -4.85405400 -0.71799500 -0.21449500

H -4.82842400 0.15835300 -0.85333000

H -6.63374200 -1.48602600 -1.13018000

H -6.68080200 -3.55589800 0.25316200

H -4.87044700 -3.95846000 1.91923000

H -3.07022200 -2.30083900 2.22040100

H -1.87234300 -0.42853000 1.45943800

C -3.82235100 2.17065900 0.59746900

C -3.79832200 3.56336300 0.50320500

C -2.58944500 4.23046000 0.47194600

C -1.36551400 3.51159600 0.47359400

C -0.14176100 4.23082900 0.47513000

C 1.06729600 3.56406800 0.44392700

C 1.09182700 2.17137900 0.35010600

H 2.04288100 1.67529200 0.19703400

H 2.00116100 4.11998500 0.43868300

H -0.17796400 5.31720300 0.49494400

H -2.55343300 5.31684300 0.45192800

H -4.73236700 4.11896200 0.50823700

H -4.77323400 1.67418300 0.75050200

C 1.09644600 -0.90896700 0.20266100

C 1.12838800 -2.11536500 -0.54550700

C 2.14346000 -3.04741000 -0.37698300

C 3.16063200 -2.82317100 0.55780500

C 3.13546300 -1.65639100 1.32922500

C 2.12459100 -0.71721800 1.16254000

H 2.09830600 0.15865800 1.80202600

H 3.90469200 -1.48463300 2.07795600

H 3.95322500 -3.55366900 0.69323100

H 2.14316500 -3.95641800 -0.97305700

H 0.34182400 -2.29991400 -1.27321000

H -0.85825400 -0.42927300 -0.50901700

Mode Frequency (cm-1)

1 34.71

2 38.58

3 44.38

4 67.06

5 73.00

6 98.47

7 140.25

8 155.42

9 178.21

10 199.89

11 219.03

12 256.85

13 264.88

14 284.43

15 350.99

16 383.97

17 420.91

18 421.05

19 445.26

20 476.41

21 485.51

22 493.47

23 511.78

24 520.99

25 524.57

26 576.67

27 590.30

28 606.42

29 628.55

30 628.81

31 641.27

32 671.19

33 702.35

34 703.79

35 726.15

36 751.30

37 759.32

38 769.52

39 781.21

40 787.94

41 795.15

42 817.64

43 840.92

44 849.93

45 855.29

46 857.00

47 866.90

48 879.23

49 896.19

50 904.29

51 923.49

52 924.34

53 960.44

54 967.52

55 974.18

56 975.14

57 996.03

58 996.13

59 1006.28

60 1006.38

61 1040.02

62 1049.08

63 1058.37

64 1059.22

65 1113.33

66 1116.14

67 1145.91

68 1159.41

69 1188.70

70 1188.84

71 1197.19

72 1203.15

73 1214.61

74 1216.57

75 1235.76

76 1238.78

77 1246.83

78 1268.91

79 1297.14

80 1310.72

81 1341.12

82 1354.95

83 1366.26

84 1370.34

85 1375.27

86 1392.30

87 1446.51

88 1467.17

89 1473.19

90 1476.64

91 1508.92

92 1517.13

93 1528.11

94 1528.16

95 1539.00

96 1571.96

97 1610.21

98 1610.31

99 1613.92

100 1618.80

101 1636.27

102 1637.11

103 3180.01

104 3180.71

105 3184.94

106 3187.00

107 3187.18

108 3187.86

109 3188.21

110 3193.42

111 3198.01

112 3198.59

113 3202.95

114 3204.16

115 3211.45

116 3211.72

117 3222.36

118 3222.43

119 3234.85

120 3235.13

C30H22 (**3**)

C 0.00000000 0.00000000 0.00000000

C -1.52496200 -0.20226900 0.08465800

C -2.19358700 0.88226600 -0.51711800

C -1.31349700 1.80543000 -1.11989500

C 0.09906100 1.24258300 -1.06668900

C 1.24390600 2.23377300 -0.94995000

C 2.43438100 1.99135800 -1.65482300

C 3.50937000 2.87788400 -1.59025700

C 3.41045000 4.04332000 -0.82953600

C 2.22465800 4.31453700 -0.14638900

C 1.15417200 3.42175700 -0.20873400

H 0.23360300 3.66622800 0.30883500

H 2.12756600 5.22806400 0.43468900

H 4.24369700 4.73952300 -0.78101700

H 4.41909100 2.66336400 -2.14525800

H 2.51374600 1.09641200 -2.26591300

H 0.24583900 0.72940200 -2.02574800

C -1.83550500 2.93347900 -1.71273800

C -3.24642200 3.12544200 -1.69787400

C -4.11040400 2.21482100 -1.11964900

C -3.60004900 1.04145700 -0.49738700

C -4.34323200 0.01892300 0.15064900

C -3.68872300 -1.05239600 0.73208000

C -2.27248700 -1.17092900 0.72142700

H -1.79855000 -2.01210300 1.21946700

H -4.27102900 -1.82608800 1.22593000

H -5.42770900 0.08629900 0.19466400

H -5.18252300 2.39576500 -1.12921100

H -3.65290000 4.02028200 -2.16236400

H -1.19564300 3.67241900 -2.18699000

C 0.76224600 -1.18320200 -0.61763700

C 2.16944800 -1.18322200 -0.64843900

C 2.88001200 -2.20060300 -1.28434100

C 2.20420700 -3.24919200 -1.91178400

C 0.81097600 -3.26101500 -1.89640800

C 0.10118200 -2.23921500 -1.25988400

H -0.98265700 -2.26896100 -1.26927900

H 0.26540600 -4.06648100 -2.38129200

H 2.75751200 -4.04408000 -2.40461500

H 3.96681700 -2.17111400 -1.28928400

H 2.71649000 -0.37952700 -0.16668100

C 0.45068200 0.34069700 1.44172900

C 1.26487200 -0.50715300 2.20603800

C 1.57291500 -0.21027000 3.53711200

C 1.06425100 0.93544400 4.14327800

C 0.22733100 1.77542200 3.40618400

C -0.07988100 1.47372800 2.08202700

H -0.77432700 2.11217400 1.54798000

H -0.19975000 2.66333000 3.86502600

H 1.30224000 1.16396700 5.17872400

H 2.20966900 -0.88916500 4.09899800

H 1.66054500 -1.41776000 1.77292600

Mode Frequency (cm-1)

1 19.95

2 35.90

3 48.89

4 61.62

5 68.46

6 78.74

7 90.09

8 105.56

9 115.27

10 168.39

11 180.45

12 221.14

13 242.41

14 250.24

15 256.35

16 266.94

17 279.55

18 286.82

19 296.37

20 312.98

21 416.53

22 431.57

23 433.56

24 458.91

25 461.83

26 478.15

27 487.00

28 511.58

29 524.19

30 537.15

31 548.29

32 560.61

33 626.27

34 631.10

35 634.12

36 635.73

37 638.43

38 662.90

39 669.70

40 672.08

41 716.43

42 717.40

43 724.43

44 727.18

45 754.31

46 756.65

47 774.54

48 778.72

49 802.09

50 806.07

51 819.48

52 830.57

53 857.10

54 858.43

55 865.09

56 871.98

57 898.90

58 902.79

59 917.86

60 923.36

61 939.03

62 941.51

63 947.39

64 961.78

65 968.62

66 971.62

67 976.88

68 980.09

69 980.74

70 992.97

71 997.63

72 999.97

73 1018.58

74 1020.02

75 1022.35

76 1023.97

77 1048.52

78 1063.80

79 1066.72

80 1067.59

81 1080.40

82 1109.95

83 1117.70

84 1120.61

85 1131.28

86 1179.61

87 1189.72

88 1193.96

89 1194.27

90 1194.85

91 1203.56

92 1220.83

93 1223.32

94 1225.72

95 1229.25

96 1230.30

97 1250.52

98 1260.94

99 1275.48

100 1306.98

101 1313.60

102 1332.85

103 1347.23

104 1368.16

105 1371.81

106 1376.07

107 1386.22

108 1393.13

109 1401.42

110 1464.97

111 1476.50

112 1488.10

113 1495.96

114 1501.16

115 1512.93

116 1544.01

117 1545.56

118 1548.32

119 1550.41

120 1635.53

121 1640.04

122 1641.98

123 1642.62

124 1651.88

125 1660.15

126 1662.67

127 1665.78

128 1674.33

129 3040.37

130 3181.26

131 3182.27

132 3182.29

133 3182.46

134 3183.40

135 3190.85

136 3191.37

137 3193.14

138 3195.27

139 3196.32

140 3201.15

141 3206.06

142 3207.44

143 3207.84

144 3208.43

145 3210.08

146 3221.23

147 3223.66

148 3224.40

149 3232.68

150 3233.35

C30H22 

C 0.00000000 0.00000000 0.00000000

C -0.27709300 1.37820200 -0.48162500

C -1.56654800 2.02087100 -0.47147600

C -2.85761000 1.32777200 -0.35444600

C -2.98295600 -0.06844700 -0.54730000

C -4.17720100 -0.86413400 -0.76039000

C -4.11957100 -2.24176700 -0.43164300

C -5.20880100 -3.08218000 -0.62564500

C -6.39315400 -2.58485600 -1.17882300

C -6.46308300 -1.23851000 -1.54591900

C -5.37697500 -0.39118400 -1.34525000

H -5.43679400 0.63449900 -1.69086900

H -7.36557400 -0.84760700 -2.00879600

H -7.24364400 -3.24253400 -1.33595800

H -5.13551000 -4.13118200 -0.34994400

H -3.20471200 -2.63480700 0.00388300

H -2.06920400 -0.64721900 -0.57170700

C -4.00497100 2.12210800 -0.10034400

C -3.98146900 3.51655600 -0.15203600

C -2.81168200 4.17287700 -0.48093100

C -1.59715800 3.44886300 -0.64510500

C -0.41312300 4.15868800 -0.96899000

C 0.78882900 3.50123800 -1.10613400

C 0.85001700 2.12499400 -0.84486600

H 1.81301400 1.62458500 -0.86351100

H 1.69325300 4.04372800 -1.36734600

H -0.47828200 5.23488700 -1.11003100

H -2.78955700 5.25374200 -0.59298800

H -4.89241800 4.07756000 0.03940700

H -4.93428500 1.62006500 0.13978200

C -0.35023400 -0.35161000 1.37460800

C -0.57343800 -1.69175000 1.77805600

C -0.91701700 -2.00567000 3.08881400

C -1.05287000 -0.99817800 4.04787900

C -0.84418700 0.33176000 3.67259200

C -0.50333000 0.65105500 2.36298500

H -0.32926900 1.68811500 2.09778200

H -0.94238000 1.12677400 4.40760300

H -1.32041200 -1.24551700 5.07135900

H -1.09037800 -3.04364400 3.36098000

H -0.49976900 -2.48908900 1.04516900

C 0.75915700 -0.89354600 -0.86720900

C 1.65539000 -1.87188100 -0.36742100

C 2.37733600 -2.69416800 -1.22618300

C 2.23317300 -2.57815800 -2.61182500

C 1.36184000 -1.61464600 -3.12931300

C 0.64347200 -0.78523900 -2.27644000

H -0.03500700 -0.04643800 -2.69097800

H 1.23852000 -1.51210800 -4.20439800

H 2.79586200 -3.22568500 -3.27872400

H 3.06759200 -3.42431600 -0.81114400

H 1.80466200 -1.96004100 0.70344700

Mode Frequency (cm-1)

1 31.00

2 34.90

3 50.78

4 60.16

5 72.51

6 74.41

7 88.23

8 100.34

9 119.20

10 158.94

11 175.00

12 193.50

13 228.06

14 244.50

15 256.60

16 265.90

17 276.80

18 298.18

19 325.82

20 343.26

21 418.53

22 419.55

23 429.76

24 433.47

25 467.34

26 482.38

27 489.87

28 497.35

29 499.63

30 516.91

31 527.61

32 572.52

33 592.43

34 623.16

35 629.86

36 631.11

37 632.93

38 634.49

39 650.25

40 676.71

41 701.71

42 706.31

43 709.35

44 710.95

45 746.56

46 763.75

47 766.40

48 775.37

49 779.16

50 794.91

51 796.14

52 809.85

53 841.25

54 842.95

55 853.94

56 856.15

57 861.66

58 888.21

59 896.47

60 912.99

61 922.29

62 927.51

63 930.20

64 941.76

65 961.21

66 970.81

67 972.25

68 974.14

69 976.74

70 992.96

71 994.43

72 996.94

73 1006.34

74 1009.28

75 1010.08

76 1040.02

77 1051.88

78 1056.08

79 1059.50

80 1062.22

81 1114.04

82 1114.79

83 1121.98

84 1138.28

85 1153.68

86 1184.53

87 1189.27

88 1189.74

89 1194.06

90 1196.94

91 1206.07

92 1214.07

93 1218.68

94 1221.87

95 1237.03

96 1248.73

97 1275.73

98 1302.32

99 1305.83

100 1310.07

101 1329.72

102 1348.78

103 1355.67

104 1364.39

105 1364.85

106 1370.71

107 1372.81

108 1391.77

109 1460.80

110 1464.71

111 1481.81

112 1482.79

113 1493.55

114 1512.78

115 1522.89

116 1528.36

117 1529.85

118 1537.70

119 1582.29

120 1610.46

121 1613.92

122 1615.55

123 1617.81

124 1631.61

125 1635.15

126 1641.60

127 1642.38

128 3180.71

129 3183.74

130 3184.80

131 3186.66

132 3187.77

133 3190.12

134 3191.14

135 3193.24

136 3198.77

137 3201.23

138 3203.76

139 3206.82

140 3208.82

141 3210.19

142 3214.41

143 3215.56

144 3218.26

145 3222.98

146 3223.22

147 3226.13

148 3233.97

149 3237.57

C36H26 (**4**)

C 0.00000000 0.00000000 0.00000000

C -0.24029900 0.01029500 1.70321800

C -0.30753400 -1.49137600 2.02020700

C -0.13522100 -2.27022900 0.86300500

C 0.04847300 -1.50530600 -0.30161500

C 0.29416300 -2.15991300 -1.49154500

C 0.30677400 -3.58003900 -1.51351000

C 0.08474300 -4.33304900 -0.37512200

C -0.14662600 -3.68989800 0.86950600

C -0.38862400 -4.31786400 2.11989900

C -0.59792000 -3.55077600 3.25126500

C -0.56298300 -2.13126000 3.21613600

H -0.74321400 -1.56435700 4.12488600

H -0.79380400 -4.04321500 4.20040800

H -0.41579600 -5.40313800 2.18074700

H 0.09396700 -5.41920700 -0.42610400

H 0.49491700 -4.08451200 -2.45790300

H 0.48227100 -1.60408500 -2.40556400

C 0.92923100 0.70863600 2.43190900

C 1.19472300 2.07430600 2.22863100

C 2.24098900 2.72414100 2.87931500

C 3.06877400 2.02233600 3.75773200

C 2.83078200 0.66730100 3.96664900

C 1.77707700 0.02285500 3.31234900

H 1.62792800 -1.03511100 3.48849700

H 3.46498900 0.09711000 4.64102900

H 3.88790600 2.52516800 4.26458500

H 2.41084900 3.78150300 2.69357600

H 0.57520900 2.64946100 1.55074900

C -1.61502700 0.58863900 2.14232200

C -1.75621900 1.65746600 3.03748800

C -3.01778400 2.09222000 3.45821600

C -4.17218600 1.46438500 3.00166300

C -4.05067400 0.38316600 2.12517500

C -2.79456500 -0.04870700 1.71249800

H -2.73230100 -0.90120300 1.04516500

H -4.93703700 -0.13123900 1.76335800

H -5.15192300 1.80159900 3.32943200

H -3.08587400 2.92371700 4.15548600

H -0.88195600 2.15699000 3.43452900

C -1.16180300 0.70406000 -0.73568100

C -1.41023200 2.07551100 -0.54969500

C -2.45025300 2.72957200 -1.20614900

C -3.28814700 2.02706600 -2.07427000

C -3.06643200 0.66692900 -2.26715400

C -2.01941000 0.01801600 -1.60654500

H -1.88331200 -1.04360500 -1.77071000

H -3.70847400 0.09602200 -2.93348500

H -4.10232000 2.53336500 -2.58564100

H -2.60735100 3.79097500 -1.03250300

H -0.78243900 2.65262200 0.11905300

C 1.38153300 0.55713100 -0.44446700

C 1.53649900 1.61511800 -1.35003900

C 2.80361400 2.02984600 -1.77433100

C 3.94979200 1.39216100 -1.31082300

C 3.81435600 0.32133100 -0.42369500

C 2.55274600 -0.09071500 -0.00757100

H 2.47943200 -0.93540400 0.66850800

H 4.69406800 -0.20020900 -0.05595700

H 4.93383200 1.71393100 -1.64122900

H 2.88247100 2.85343500 -2.47981100

H 0.66872900 2.12178700 -1.75217500

Mode Frequency (cm-1)

1 23.26

2 41.05

3 55.37

4 61.60

5 65.88

6 68.88

7 78.11

8 85.92

9 90.41

10 99.99

11 114.79

12 117.34

13 159.77

14 186.03

15 226.94

16 234.00

17 240.48

18 251.75

19 268.49

20 279.90

21 282.55

22 294.56

23 295.75

24 306.72

25 313.68

26 316.62

27 416.87

28 421.83

29 424.93

30 433.92

31 456.99

32 481.52

33 492.41

34 492.95

35 512.11

36 515.89

37 534.88

38 542.79

39 560.03

40 568.40

41 632.39

42 635.00

43 636.16

44 638.19

45 641.60

46 659.57

47 662.24

48 666.09

49 680.07

50 688.31

51 713.71

52 716.13

53 718.93

54 723.53

55 742.69

56 750.45

57 761.68

58 774.67

59 775.45

60 798.94

61 811.02

62 820.84

63 829.19

64 845.01

65 850.57

66 855.63

67 856.63

68 861.46

69 871.39

70 892.23

71 910.98

72 930.76

73 932.10

74 932.54

75 940.09

76 942.33

77 951.39

78 966.62

79 974.38

80 976.54

81 978.24

82 978.73

83 981.78

84 986.63

85 995.49

86 995.70

87 1008.31

88 1009.08

89 1017.62

90 1018.99

91 1019.88

92 1021.71

93 1024.92

94 1053.14

95 1065.91

96 1067.56

97 1068.15

98 1071.87

99 1083.01

100 1111.90

101 1123.71

102 1125.16

103 1128.52

104 1133.09

105 1163.78

106 1177.35

107 1184.33

108 1194.29

109 1195.60

110 1195.75

111 1196.63

112 1198.88

113 1215.42

114 1224.60

115 1226.61

116 1233.43

117 1237.68

118 1238.25

119 1253.26

120 1267.94

121 1273.31

122 1333.36

123 1335.38

124 1344.16

125 1347.22

126 1370.75

127 1377.41

128 1381.76

129 1382.48

130 1383.87

131 1402.86

132 1465.24

133 1477.94

134 1487.14

135 1488.26

136 1494.76

137 1495.06

138 1516.09

139 1546.49

140 1547.82

141 1549.04

142 1550.16

143 1554.80

144 1634.52

145 1637.57

146 1638.38

147 1641.25

148 1642.08

149 1649.74

150 1659.18

151 1660.32

152 1662.17

153 1664.13

154 1674.39

155 3180.20

156 3181.33

157 3181.43

158 3182.93

159 3184.13

160 3184.21

161 3191.80

162 3191.98

163 3195.54

164 3195.94

165 3196.52

166 3198.11

167 3205.82

168 3206.02

169 3208.17

170 3209.32

171 3210.56

172 3211.19

173 3224.96

174 3225.53

175 3228.68

176 3239.01

177 3241.83

178 3243.54

179 3244.50

180 3244.71

C36H26 

C 0.00000000 0.00000000 0.00000000

C -0.02623600 1.40083700 -0.45825800

C -1.18828200 2.07368200 -1.00772000

C -2.35287900 1.41206000 -1.56538900

C -2.38247900 0.01803100 -2.04393700

C -1.31204300 -0.46259900 -2.92288900

C -0.98216400 -1.83570800 -3.01328600

C -0.02199900 -2.29320200 -3.91000400

C 0.64389500 -1.39899800 -4.75238000

C 0.34133600 -0.03608400 -4.67582200

C -0.61426200 0.42602700 -3.77530300

H -0.85439500 1.48376400 -3.75028700

H 0.84294900 0.67091100 -5.33211900

H 1.38757400 -1.75836700 -5.45831000

H 0.21345200 -3.35368800 -3.94566700

H -1.47944800 -2.54078500 -2.35496600

C -3.60366400 -0.76977700 -1.87282400

C -4.05413400 -1.68733700 -2.85449300

C -5.23415600 -2.40495600 -2.68680600

C -6.00942900 -2.23876000 -1.53549700

C -5.58784600 -1.33585500 -0.55520500

C -4.41166500 -0.61364500 -0.71942800

H -4.08617700 0.06250200 0.06236000

H -6.17396100 -1.20220600 0.35052000

H -6.93033700 -2.80112700 -1.40663300

H -5.55754700 -3.09015300 -3.46645800

H -3.48480500 -1.80895000 -3.76965900

C -3.49055700 2.18530300 -1.83391600

C -3.51020500 3.58194800 -1.69399500

C -2.35904100 4.24116400 -1.33140100

C -1.18486500 3.51609900 -0.99998300

C -0.00737500 4.23238400 -0.66099900

C 1.14076900 3.56404500 -0.30576300

C 1.11472500 2.16616500 -0.18090000

H 1.98662800 1.66227600 0.22120300

H 2.04626600 4.11008300 -0.05531500

H -0.03576800 5.31880600 -0.69140400

H -2.32570200 5.32712500 -1.28940300

H -4.41314000 4.13465300 -1.93908100

H -4.36455200 1.68975600 -2.24218700

C -1.07177800 -0.49414400 0.86942600

C -1.40018200 -1.86881200 0.93777500

C -2.36263800 -2.34097600 1.82423900

C -3.03204300 -1.46050900 2.67826400

C -2.73002100 -0.09649200 2.62434000

C -1.77220200 0.38046500 1.73392600

H -1.53236100 1.43859000 1.72571200

H -3.23403500 0.59960400 3.29044300

H -3.77737300 -1.83155000 3.37638400

H -2.59701100 -3.40216100 1.84310200

H -0.89959600 -2.56335000 0.27057500

C 1.21983300 -0.78767900 -0.18217900

C 1.67012700 -1.71693900 0.78829400

C 2.84849000 -2.43484600 0.61089100

C 3.62224600 -2.25705100 -0.53966000

C 3.20081600 -1.34227800 -1.50895200

C 2.02640900 -0.61963500 -1.33484600

H 1.70178000 0.06660400 -2.10825100

H 3.78613300 -1.19920600 -2.41380400

H 4.54189700 -2.81958100 -0.67650300

H 3.17153700 -3.12935300 1.38238900

H 1.10201800 -1.84780700 1.70300300

Mode Frequency (cm-1)

1 29.06

2 38.47

3 47.37

4 58.29

5 67.32

6 71.24

7 77.35

8 84.23

9 90.29

10 90.90

11 112.51

12 116.32

13 118.18

14 162.88

15 163.65

16 192.74

17 233.77

18 241.65

19 249.80

20 257.98

21 272.49

22 280.68

23 289.30

24 313.31

25 330.48

26 338.70

27 417.37

28 418.74

29 430.01

30 430.34

31 436.49

32 457.78

33 470.49

34 491.24

35 494.25

36 496.03

37 506.66

38 529.66

39 535.63

40 565.60

41 600.43

42 625.60

43 628.47

44 630.76

45 632.07

46 634.41

47 638.36

48 641.28

49 658.97

50 680.98

51 687.61

52 708.13

53 709.22

54 711.01

55 714.97

56 731.55

57 765.41

58 769.17

59 771.46

60 780.94

61 783.56

62 784.42

63 800.57

64 823.87

65 837.74

66 850.62

67 853.79

68 861.30

69 862.07

70 904.52

71 906.39

72 918.05

73 924.59

74 925.03

75 932.73

76 935.02

77 940.85

78 944.56

79 965.72

80 968.28

81 969.99

82 975.03

83 981.47

84 982.06

85 990.15

86 996.00

87 998.85

88 999.44

89 1010.06

90 1010.27

91 1011.65

92 1011.95

93 1044.76

94 1056.14

95 1059.95

96 1060.15

97 1066.01

98 1068.29

99 1116.16

100 1116.93

101 1122.90

102 1124.55

103 1137.62

104 1150.25

105 1186.71

106 1189.56

107 1190.03

108 1190.41

109 1194.94

110 1195.43

111 1215.10

112 1215.77

113 1221.15

114 1223.34

115 1228.60

116 1233.58

117 1245.17

118 1287.98

119 1291.39

120 1305.88

121 1307.89

122 1327.64

123 1327.98

124 1345.63

125 1347.61

126 1362.24

127 1367.69

128 1371.56

129 1372.18

130 1375.92

131 1377.31

132 1405.23

133 1465.91

134 1482.86

135 1484.68

136 1485.10

137 1492.94

138 1493.72

139 1528.90

140 1529.08

141 1532.36

142 1532.87

143 1546.07

144 1583.68

145 1613.10

146 1613.73

147 1616.52

148 1616.94

149 1634.72

150 1635.49

151 1637.03

152 1640.13

153 1643.37

154 1644.08

155 3181.92

156 3182.34

157 3183.55

158 3183.78

159 3185.01

160 3186.30

161 3189.59

162 3190.06

163 3192.48

164 3192.63

165 3201.68

166 3203.15

167 3206.63

168 3207.43

169 3207.93

170 3208.31

171 3214.47

172 3215.85

173 3217.59

174 3218.49

175 3222.59

176 3222.99

177 3223.60

178 3224.77

179 3239.48

180 3239.99

**HPE**

C 0.00000000 0.00000000 0.00000000

C 1.73845100 0.08923300 -0.00524100

C 2.40705300 -1.26642700 -0.42545200

C 3.50406600 -1.29175800 -1.30296400

C 4.18176700 -2.47678400 -1.60605700

C 3.79115500 -3.68291000 -1.03307700

C 2.71043800 -3.68300700 -0.15058800

C 2.03884300 -2.49899600 0.14546000

H 1.19274800 -2.55950900 0.81427600

H 2.37760800 -4.60989000 0.30903900

H 4.31594900 -4.60538900 -1.26695200

H 5.02463600 -2.44243800 -2.29186100

H 3.85873900 -0.37627400 -1.75645500

C 2.26636700 1.18122300 -0.99790500

C 3.31642100 2.04499500 -0.64324400

C 3.86174500 2.95751800 -1.55175800

C 3.38131600 3.03178300 -2.85584100

C 2.35093600 2.17252300 -3.23763900

C 1.81112800 1.26736600 -2.32695300

H 0.99660300 0.64257900 -2.66542100

H 1.95367000 2.20817400 -4.24870700

H 3.80085700 3.74195800 -3.56347300

H 4.67312500 3.60438900 -1.22797700

H 3.74025800 2.00763500 0.35135200

C 2.29997400 0.45838500 1.41188100

C 3.39970400 -0.21823800 1.96493400

C 3.96507800 0.17016000 3.18390400

C 3.45820200 1.25889000 3.88691600

C 2.37484200 1.95588100 3.34999200

C 1.81330900 1.55987100 2.13896100

H 0.95421300 2.10648300 1.77943100

H 1.95432200 2.80887600 3.87570800

H 3.89895100 1.56150500 4.83308800

H 4.81394800 -0.38641100 3.57334400

H 3.83726100 -1.06151800 1.44748100

C -0.67328000 1.19651500 -0.76176300

C -1.76631300 0.98734700 -1.62114300

C -2.44716700 2.04953400 -2.22376900

C -2.06734000 3.36562800 -1.97932200

C -0.99503900 3.60043200 -1.11870800

C -0.31883700 2.53742000 -0.52454900

H 0.51862600 2.77681400 0.11363100

H -0.67254900 4.61683700 -0.90816200

H -2.59559500 4.19296600 -2.44537900

H -3.28563200 1.83328200 -2.88109400

H -2.11800200 -0.01508300 -1.82461400

C -0.57012100 0.00799700 1.46057600

C -1.67144300 0.80326600 1.81653200

C -2.24550900 0.74112400 3.09026600

C -1.74628600 -0.13180800 4.05158100

C -0.66106300 -0.94294000 3.71738400

C -0.09053900 -0.87060800 2.44957700

H 0.76694300 -1.49671100 2.25032900

H -0.24798100 -1.63532900 4.44629200

H -2.19324300 -0.18336200 5.04083100

H -3.09412700 1.38083300 3.31926900

H -2.10552700 1.48383200 1.09625700

C -0.51494800 -1.31178500 -0.68414700

C -0.05638600 -1.72828600 -1.94812800

C -0.57805100 -2.84652900 -2.59456700

C -1.59533800 -3.59516800 -2.00293700

C -2.08014100 -3.19533200 -0.76141600

C -1.55376700 -2.07036900 -0.11926600

H -1.98265600 -1.78748700 0.83262900

H -2.88104900 -3.75146000 -0.28077000

H -2.00049600 -4.47205500 -2.50079800

H -0.17452300 -3.13548300 -3.56154200

H 0.75283100 -1.20300700 -2.43559800

Mode Frequency (cm-1)

1 32.76

2 34.95

3 41.05

4 64.25

5 65.16

6 75.60

7 78.33

8 79.33

9 83.24

10 89.16

11 98.19

12 101.84

13 107.69

14 120.66

15 125.85

16 160.25

17 167.26

18 218.02

19 239.88

20 258.63

21 269.05

22 271.03

23 272.60

24 295.29

25 298.34

26 303.47

27 304.75

28 306.38

29 310.79

30 314.47

31 419.20

32 421.22

33 422.82

34 428.05

35 430.82

36 439.97

37 500.92

38 514.06

39 524.01

40 527.14

41 543.60

42 545.34

43 623.01

44 623.64

45 633.28

46 634.82

47 635.36

48 638.61

49 640.54

50 641.24

51 654.61

52 655.86

53 656.21

54 674.23

55 710.84

56 711.41

57 721.18

58 722.36

59 724.38

60 730.92

61 747.25

62 748.32

63 769.22

64 769.95

65 779.42

66 780.03

67 838.38

68 843.29

69 845.24

70 848.21

71 857.10

72 859.22

73 863.24

74 864.17

75 867.72

76 871.98

77 921.30

78 928.23

79 930.47

80 938.13

81 942.89

82 951.14

83 966.09

84 967.02

85 969.47

86 969.92

87 976.12

88 978.90

89 982.06

90 986.85

91 992.57

92 993.65

93 995.58

94 996.99

95 1001.18

96 1014.78

97 1016.46

98 1017.02

99 1017.80

100 1022.38

101 1023.74

102 1033.37

103 1061.34

104 1064.33

105 1066.31

106 1067.68

107 1070.98

108 1072.67

109 1114.10

110 1117.72

111 1123.41

112 1127.77

113 1130.77

114 1134.09

115 1148.50

116 1155.23

117 1158.38

118 1161.31

119 1178.74

120 1179.16

121 1193.11

122 1194.09

123 1196.16

124 1197.57

125 1198.76

126 1199.31

127 1224.44

128 1226.29

129 1233.56

130 1238.43

131 1244.09

132 1247.02

133 1322.13

134 1327.23

135 1330.36

136 1331.71

137 1335.49

138 1337.77

139 1365.04

140 1366.19

141 1372.19

142 1376.81

143 1382.10

144 1384.55

145 1483.88

146 1486.54

147 1487.07

148 1487.89

149 1489.55

150 1490.45

151 1538.93

152 1540.10

153 1542.61

154 1545.42

155 1548.84

156 1549.65

157 1632.82

158 1634.69

159 1635.46

160 1636.11

161 1637.52

162 1638.79

163 1655.62

164 1656.34

165 1658.08

166 1658.59

167 1659.46

168 1662.24

169 3181.18

170 3182.38

171 3182.43

172 3182.73

173 3183.17

174 3183.29

175 3191.55

176 3191.87

177 3192.47

178 3192.90

179 3192.97

180 3193.31

181 3206.85

182 3207.40

183 3207.54

184 3207.88

185 3208.21

186 3208.64

187 3242.96

188 3246.96

189 3247.11

190 3248.20

191 3252.10

192 3252.99

193 3258.02

194 3260.53

195 3265.40

196 3277.28

197 3278.52

198 3290.14

TPM

C 0.00000000 0.00000000 0.00000000

C 0.90909900 -1.15697200 0.42530200

C 1.00177200 -2.29225800 -0.39183100

C 1.79258200 -3.38069700 -0.02491300

C 2.50852800 -3.35257700 1.17375000

C 2.42536700 -2.22848600 1.99559800

C 1.63475900 -1.13912500 1.62311500

H 1.59217800 -0.26281200 2.26330100

H 2.98255200 -2.19284100 2.92839100

H 3.12829600 -4.19746500 1.46177200

H 1.85063000 -4.24891800 -0.67646000

H 0.44293100 -2.32418500 -1.32497100

C 0.55403000 1.36867800 0.41638900

C 1.65399400 1.89047900 -0.28120800

C 2.21213500 3.11742500 0.07085300

C 1.67889400 3.85037100 1.13437700

C 0.58439500 3.34445800 1.83356400

C 0.02470000 2.11437400 1.47587300

H -0.83713600 1.73959000 2.01944900

H 0.15719900 3.90685700 2.65989500

H 2.11270900 4.80787400 1.41040600

H 3.06302400 3.50311600 -0.48504300

H 2.07869500 1.32453600 -1.10770200

C -1.46015300 -0.21047800 0.41556000

C -2.47996300 0.32454000 -0.38498400

C -3.82162800 0.17573900 -0.03651700

C -4.17049700 -0.51379700 1.12691400

C -3.16602600 -1.04992200 1.93221500

C -1.82282300 -0.90151500 1.57805700

H -1.05286700 -1.34020200 2.20577900

H -3.42410400 -1.59260500 2.83798200

H -5.21562600 -0.63611000 1.39859800

H -4.59517000 0.59440100 -0.67548200

H -2.21611400 0.86469500 -1.29182900

H 0.00174500 -0.00323200 -1.09815700

Mode Frequency (cm-1)

1 21.32

2 40.18

3 50.30

4 64.23

5 66.88

6 84.34

7 211.95

8 228.13

9 240.33

10 268.94

11 293.64

12 298.78

13 414.29

14 417.37

15 420.91

16 483.99

17 506.80

18 510.13

19 618.13

20 618.75

21 631.93

22 634.57

23 637.06

24 675.17

25 716.23

26 717.26

27 719.91

28 749.64

29 772.07

30 774.13

31 835.05

32 861.08

33 862.08

34 867.91

35 875.66

36 877.29

37 932.37

38 933.40

39 937.27

40 967.09

41 969.14

42 975.28

43 994.09

44 994.53

45 997.41

46 1018.90

47 1019.10

48 1019.43

49 1056.78

50 1058.78

51 1061.06

52 1109.71

53 1113.77

54 1117.92

55 1187.80

56 1191.40

57 1192.68

58 1194.64

59 1208.94

60 1212.80

61 1216.83

62 1218.60

63 1218.86

64 1287.16

65 1293.38

66 1340.28

67 1365.07

68 1366.93

69 1369.86

70 1377.94

71 1386.52

72 1493.56

73 1499.83

74 1501.56

75 1545.71

76 1546.70

77 1547.60

78 1640.67

79 1644.03

80 1644.58

81 1660.32

82 1661.25

83 1666.62

84 3033.03

85 3174.67

86 3175.10

87 3175.62

88 3182.98

89 3183.88

90 3185.00

91 3193.38

92 3193.76

93 3194.16

94 3204.06

95 3204.86

96 3205.20

97 3211.09

98 3212.63

99 3213.64

TPM 

C 0.00000000 0.00000000 0.00000000

C -0.34913000 -1.42274200 -0.00051500

C -1.49231700 -1.90186800 -0.68423600

C -1.82139800 -3.25356900 -0.68372500

C -1.02801000 -4.17558600 0.00469400

C 0.10457500 -3.72564500 0.68926900

C 0.44090300 -2.37586100 0.68589100

H 1.31201900 -2.03914100 1.23888800

H 0.72522000 -4.43011700 1.23719300

H -1.28857500 -5.23039800 0.00776900

H -2.69826200 -3.59090600 -1.23043900

H -2.10843400 -1.20101500 -1.23849300

C 1.40543200 0.40926300 0.00147800

C 2.39443900 -0.35013100 -0.66936400

C 3.72943200 0.03938600 -0.66793900

C 4.12919500 1.19779100 0.00457600

C 3.17111200 1.96341200 0.67523000

C 1.83385100 1.58101900 0.67114200

H 1.10470100 2.17753100 1.21018400

H 3.46956700 2.86046700 1.21166400

H 5.17290600 1.49990900 0.00518300

H 4.46224000 -0.55939000 -1.20294400

H 2.09626800 -1.24030400 -1.21393400

C -1.05959900 1.01199700 0.00222600

C -0.90507100 2.24487500 -0.67589800

C -1.91510000 3.20222900 -0.67491900

C -3.11234300 2.96743000 0.00733000

C -3.28649900 1.75901800 0.68782500

C -2.28187500 0.79619400 0.68357100

H -2.42437900 -0.12913500 1.23239000

H -4.20828200 1.56879800 1.23177700

H -3.89974400 3.71637400 0.00889300

H -1.77075100 4.13346100 -1.21681500

H 0.01128400 2.43341000 -1.22589200

Mode Frequency (cm-1)

1 52.37

2 57.37

3 74.34

4 84.94

5 85.95

6 108.67

7 229.78

8 234.46

9 235.87

10 277.87

11 324.62

12 325.42

13 416.58

14 420.60

15 433.30

16 441.06

17 499.01

18 501.32

19 608.19

20 628.68

21 629.29

22 635.15

23 636.14

24 636.80

25 707.16

26 708.62

27 716.70

28 719.16

29 767.10

30 769.89

31 784.45

32 853.67

33 855.74

34 862.27

35 913.54

36 916.64

37 923.59

38 941.80

39 943.46

40 968.87

41 971.31

42 977.20

43 988.11

44 989.81

45 994.96

46 1009.45

47 1010.35

48 1012.30

49 1053.94

50 1056.80

51 1057.94

52 1114.02

53 1119.89

54 1120.89

55 1181.48

56 1191.04

57 1191.63

58 1193.09

59 1211.47

60 1212.89

61 1222.88

62 1303.39

63 1304.64

64 1315.22

65 1349.98

66 1351.86

67 1368.02

68 1373.78

69 1374.93

70 1480.78

71 1493.27

72 1494.02

73 1533.62

74 1537.87

75 1541.65

76 1612.80

77 1617.06

78 1618.37

79 1637.89

80 1638.92

81 1648.18

82 3182.06

83 3182.42

84 3185.55

85 3190.54

86 3190.96

87 3193.38

88 3204.11

89 3204.80

90 3208.44

91 3214.15

92 3215.18

93 3217.61

94 3217.91

95 3218.34

96 3220.82

DPNM 

C 0.00000000 0.00000000 0.00000000

C 0.44326900 1.39669900 0.01270000

C 1.57535300 1.81533100 -0.72688100

C 1.99703600 3.14103600 -0.71567500

C 1.31005300 4.09633900 0.03847100

C 0.19210400 3.70587400 0.78112400

C -0.23694400 2.38268500 0.76735600

H -1.09615700 2.09160700 1.36291800

H -0.34391200 4.43582700 1.38247600

H 1.64185900 5.13102000 0.04821000

H 2.86228700 3.43248500 -1.30573000

H 2.10908500 1.08816900 -1.33054400

C 0.98858500 -1.07650900 -0.11007400

C 0.70773200 -2.26250300 -0.82910400

C 1.64961600 -3.28077800 -0.93891000

C 2.90215100 -3.15506900 -0.33187800

C 3.20128100 -1.99323700 0.38555700

C 2.26444600 -0.97047300 0.49259400

H 2.50398000 -0.07999400 1.06512300

H 4.16802500 -1.88706200 0.87120700

H 3.63620000 -3.95162300 -0.41782800

H 1.40885200 -4.17371600 -1.51031600

H -0.25306800 -2.36417000 -1.32420100

C -1.42140900 -0.32152200 0.08758700

C -2.39983800 0.51357600 -0.45993900

C -3.78132300 0.21923700 -0.37243600

C -4.20306100 -0.97094300 0.30512200

C -3.20170700 -1.81690200 0.86118100

C -1.86978900 -1.51336400 0.75266800

H -1.13065900 -2.16738900 1.20326500

H -3.51241500 -2.71512500 1.39041100

C -5.58719900 -1.25855000 0.39698800

C -6.52288500 -0.41243200 -0.16098100

C -6.10933800 0.76061300 -0.83759700

C -4.77108100 1.06853400 -0.94090900

H -4.45085700 1.96991400 -1.45838300

H -6.85469700 1.41943500 -1.27508400

H -7.58172200 -0.64440700 -0.08428600

H -5.90124500 -2.16183800 0.91533700

H -2.09712800 1.41129400 -0.99093900

Mode Frequency (cm-1)

1 38.96

2 48.89

3 56.69

4 74.26

5 78.00

6 87.12

7 146.70

8 190.70

9 196.31

10 229.71

11 248.17

12 272.68

13 295.08

14 314.26

15 398.27

16 416.69

17 419.78

18 425.53

19 456.76

20 490.31

21 492.29

22 520.74

23 525.19

24 572.11

25 599.16

26 627.39

27 631.69

28 633.36

29 642.08

30 678.10

31 692.78

32 707.64

33 710.85

34 763.54

35 768.81

36 778.67

37 780.37

38 783.81

39 828.83

40 837.92

41 855.49

42 860.30

43 876.34

44 909.78

45 922.52

46 924.64

47 936.96

48 945.98

49 954.10

50 972.18

51 973.55

52 977.99

53 987.33

54 987.54

55 994.00

56 995.30

57 1008.77

58 1010.73

59 1048.59

60 1053.56

61 1056.33

62 1110.97

63 1113.42

64 1148.49

65 1176.69

66 1186.43

67 1189.84

68 1190.07

69 1191.22

70 1209.66

71 1213.72

72 1233.04

73 1266.43

74 1299.27

75 1301.03

76 1307.21

77 1321.57

78 1342.39

79 1363.15

80 1367.56

81 1385.62

82 1404.42

83 1419.27

84 1472.98

85 1483.74

86 1488.64

87 1504.51

88 1526.98

89 1529.50

90 1546.39

91 1599.63

92 1610.01

93 1613.80

94 1632.19

95 1635.24

96 1642.35

97 1663.44

98 3174.32

99 3176.74

100 3179.30

101 3179.78

102 3180.19

103 3186.67

104 3187.73

105 3192.92

106 3198.32

107 3201.41

108 3202.20

109 3206.57

110 3207.65

111 3208.86

112 3212.22

113 3212.83

114 3214.96

Structure **5**

C 0.00000000 0.00000000 0.00000000

C 1.08161100 -0.87654600 -1.04973300

C 1.13876000 -2.40294000 -0.70111900

C 1.11895900 -3.38240000 -1.70824300

C 1.27985700 -4.74183300 -1.42347600

C 1.47722900 -5.17328900 -0.11558500

C 1.51031700 -4.21961600 0.90231800

C 1.34583800 -2.86753800 0.61144900

H 1.35675600 -2.17591500 1.44192600

H 1.65842600 -4.52450200 1.93497900

H 1.60465500 -6.22883800 0.10918400

H 1.25541700 -5.45785700 -2.24115800

H 0.98635700 -3.09644400 -2.74284100

C 0.66176200 -0.77559000 -2.55561100

C 1.61187400 -0.55009900 -3.56568200

C 1.26543800 -0.54865900 -4.92055100

C -0.04631100 -0.79159600 -5.31559700

C -1.00438400 -1.04125200 -4.33275600

C -0.65366400 -1.03338500 -2.98467300

H -1.44042400 -1.20794700 -2.26446000

H -2.03736400 -1.23469200 -4.61017800

H -0.31967500 -0.79105100 -6.36740200

H 2.03747900 -0.36134200 -5.66262400

H 2.64897200 -0.37772200 -3.31048100

C 2.54694700 -0.32941300 -0.95114300

C 3.63209200 -1.17515400 -0.80545700

C 4.97752600 -0.71138700 -0.81973800

C 5.24121100 0.67893500 -1.01200500

C 4.12473300 1.54019600 -1.17554800

C 2.84009100 1.05684000 -1.14421500

H 2.03228900 1.76541400 -1.25301200

H 4.29479900 2.60412000 -1.32291700

C 6.58553200 1.13344000 -1.03261800

C 7.62759500 0.24705700 -0.86858600

C 7.36926200 -1.13198600 -0.67697400

C 6.07377100 -1.59979000 -0.65460600

H 5.87289300 -2.65826300 -0.50685700

H 8.19999700 -1.82045300 -0.54677200

H 8.65389800 0.60394800 -0.88536700

H 6.78038900 2.19322800 -1.18047800

H 3.48599300 -2.23945300 -0.67687800

C -1.00866600 0.90509000 -0.79099400

C -2.35986300 0.98941500 -0.41041700

C -3.24809100 1.87295100 -1.03076700

C -2.81604400 2.71505400 -2.05105700

C -1.47683000 2.65998100 -2.43835400

C -0.59791900 1.77561500 -1.81717400

H 0.41977700 1.75093200 -2.17757100

H -1.10820100 3.30076500 -3.23492200

H -3.50586100 3.40195900 -2.53409400

H -4.28333000 1.90000400 -0.70018300

H -2.73934700 0.37308200 0.39323500

C 0.78978600 0.94259900 0.97204300

C 0.39398400 2.27289500 1.19029800

C 1.04147600 3.09173100 2.12039100

C 2.10464300 2.60554700 2.87493000

C 2.50530300 1.28206300 2.68909200

C 1.85663700 0.47239600 1.75956000

H 2.22119500 -0.53663600 1.63322600

H 3.33381400 0.87344300 3.26143700

H 2.61063400 3.24187000 3.59618400

H 0.69961500 4.11541100 2.25060900

H -0.43535700 2.69114600 0.63621600

C -0.86045500 -0.96319700 0.88452500

C -1.58987500 -2.02831200 0.32466500

C -2.43200300 -2.83074700 1.09004100

C -2.58324000 -2.59396900 2.45664600

C -1.88525800 -1.53677200 3.03254000

C -1.04311000 -0.73352000 2.25715600

H -0.53357100 0.08856600 2.74104400

H -1.99361900 -1.32219200 4.09267800

H -3.23685500 -3.22044000 3.05811100

H -2.96573400 -3.64828000 0.61258500

H -1.48836100 -2.26027400 -0.72567800

Mode Frequency (cm-1)

1 33.62

2 41.10

3 60.39

4 65.81

5 70.30

6 78.82

7 90.51

8 93.12

9 95.70

10 100.80

11 113.73

12 119.15

13 129.42

14 141.17

15 152.48

16 165.03

17 166.59

18 173.98

19 203.80

20 235.90

21 247.55

22 265.69

23 271.97

24 282.48

25 290.77

26 294.72

27 310.25

28 312.81

29 318.98

30 319.19

31 326.69

32 351.54

33 425.65

34 428.35

35 435.26

36 436.68

37 437.67

38 446.09

39 448.41

40 502.45

41 523.12

42 529.91

43 531.56

44 542.85

45 545.70

46 560.64

47 563.39

48 590.63

49 624.15

50 637.23

51 638.49

52 640.10

53 641.04

54 642.23

55 644.20

56 652.06

57 656.85

58 664.74

59 687.81

60 703.32

61 735.21

62 737.53

63 740.71

64 744.18

65 747.96

66 787.07

67 798.20

68 806.69

69 813.70

70 823.91

71 828.61

72 831.93

73 833.43

74 843.06

75 865.88

76 871.66

77 891.24

78 903.15

79 915.05

80 919.20

81 921.07

82 923.13

83 926.28

84 927.55

85 947.55

86 956.09

87 962.79

88 980.84

89 983.05

90 991.34

91 996.39

92 999.85

93 1004.79

94 1008.23

95 1013.88

96 1014.65

97 1015.38

98 1016.12

99 1016.38

100 1017.22

101 1022.81

102 1025.13

103 1026.84

104 1028.77

105 1030.60

106 1034.79

107 1039.39

108 1044.37

109 1045.34

110 1046.06

111 1048.07

112 1049.52

113 1053.76

114 1073.95

115 1076.41

116 1077.99

117 1079.19

118 1083.02

119 1134.60

120 1135.77

121 1140.64

122 1141.39

123 1142.97

124 1159.03

125 1181.02

126 1185.87

127 1187.87

128 1192.52

129 1205.91

130 1206.97

131 1210.62

132 1220.35

133 1221.92

134 1222.46

135 1223.15

136 1224.15

137 1231.35

138 1248.81

139 1257.43

140 1259.84

141 1262.53

142 1264.89

143 1267.63

144 1292.68

145 1321.39

146 1321.95

147 1329.41

148 1330.49

149 1335.51

150 1339.64

151 1392.33

152 1395.47

153 1396.35

154 1401.98

155 1403.12

156 1406.37

157 1439.55

158 1451.71

159 1487.42

160 1495.52

161 1497.34

162 1498.61

163 1499.89

164 1500.40

165 1529.81

166 1560.26

167 1561.01

168 1561.67

169 1563.99

170 1564.07

171 1566.92

172 1640.06

173 1641.80

174 1641.92

175 1643.13

176 1644.01

177 1650.14

178 1662.10

179 1662.49

180 1664.11

181 1664.60

182 1667.17

183 1668.83

184 1683.00

185 3030.76

186 3031.74

187 3031.84

188 3032.24

189 3032.46

190 3033.22

191 3038.68

192 3042.37

193 3042.41

194 3042.87

195 3043.85

196 3044.01

197 3044.72

198 3050.82

199 3058.22

200 3058.34

201 3058.74

202 3059.42

203 3059.95

204 3061.52

205 3079.47

206 3083.34

207 3083.40

208 3083.77

209 3086.28

210 3091.25

211 3099.77

212 3104.22

213 3104.98

214 3110.85

215 3112.70

216 3115.34

Structure **6**

C 0.00000000 0.00000000 0.00000000

C -0.94078500 -0.57635300 1.35426300

C -0.41536400 -1.93771600 1.92867800

C -0.36475200 -2.16315700 3.31450800

C -0.00171800 -3.40368700 3.84823900

C 0.31222100 -4.47045000 3.01172300

C 0.24993700 -4.27760000 1.63125600

C -0.10754400 -3.03786400 1.10603900

H -0.11977100 -2.93466500 0.03045800

H 0.48912700 -5.09156600 0.95208600

H 0.59787500 -5.43456100 3.42373600

H 0.02785900 -3.52604700 4.92808400

H -0.62192600 -1.37034000 4.00362200

C -0.92783700 0.45048300 2.53548700

C -2.10449700 0.79979600 3.21836700

C -2.08407100 1.63369200 4.34117600

C -0.88206500 2.13787300 4.82787800

C 0.30197600 1.79103000 4.17580400

C 0.27450800 0.96247500 3.05690100

H 1.21523700 0.73728100 2.57473600

H 1.25602200 2.16929800 4.53338300

H -0.86442300 2.78533600 5.70057100

H -3.02104200 1.87682100 4.83583900

H -3.06071600 0.41382800 2.89117700

C -2.43823800 -0.80956300 0.95222400

C -3.11951800 -1.96301700 1.29865600

C -4.50226800 -2.15592100 1.02090600

C -5.24154900 -1.12046900 0.37300300

C -4.54232900 0.06650000 0.03312500

H -5.07839700 0.87193000 -0.46382400

C -3.20624900 0.21207600 0.31006400

H -2.72948800 1.12860100 -0.00152900

C -6.62031000 -1.31640600 0.10321100

C -7.24571300 -2.49055900 0.46139800

C -6.51589300 -3.51913600 1.10553800

C -5.17567100 -3.35448400 1.37858000

H -4.61361700 -4.14418400 1.87221500

H -7.01821100 -4.44141700 1.38479800

H -8.30278000 -2.63086400 0.25186400

H -7.17554700 -0.52189000 -0.39032400

H -2.61364100 -2.77178500 1.80998900

C 0.41701900 1.50430700 0.16787300

C 1.72699300 1.93632900 -0.10057200

C 2.09043200 3.28438300 -0.02560400

C 1.15188700 4.25475900 0.30919800

C -0.15949400 3.85445800 0.56613900

C -0.51293700 2.50900600 0.49454900

H -1.53155600 2.24835600 0.73942500

H -0.91489600 4.58774600 0.83648100

H 1.43429800 5.30241000 0.37071400

H 3.11891300 3.56588700 -0.23728900

H 2.49120400 1.22381300 -0.37845200

C -0.80800000 -0.11788400 -1.33500800

C -0.86271900 0.93602400 -2.26209900

C -1.51538800 0.80311900 -3.49146400

C -2.12784000 -0.39600700 -3.84316800

C -2.07214400 -1.46277100 -2.94538600

C -1.42052100 -1.32336000 -1.72296800

H -1.42943200 -2.17032000 -1.05183800

H -2.54275400 -2.41131000 -3.19045400

H -2.63919300 -0.50016800 -4.79640600

H -1.53424600 1.64969000 -4.17332000

H -0.38889200 1.88265400 -2.03847900

C 1.32522100 -0.80952100 -0.20004300

C 2.18473300 -1.11173300 0.84358800

C 3.43327000 -1.75726000 0.65378000

C 3.85061800 -2.10381600 -0.66865400

C 2.98096200 -1.77503100 -1.73587600

C 1.77226900 -1.15340900 -1.51190200

H 1.15826100 -0.91130800 -2.36853700

H 3.27936000 -2.01478900 -2.75400100

C 5.10200500 -2.75052800 -0.85389600

C 5.90599000 -3.04267000 0.22419200

C 5.49329600 -2.70215000 1.53763900

C 4.28660500 -2.07460100 1.74651800

H 3.96601000 -1.81616000 2.75287400

H 6.13609400 -2.94125400 2.38065600

H 6.86167600 -3.53794800 0.07405600

H 5.41276300 -3.01061700 -1.86326600

H 1.91466800 -0.88758300 1.86682800

Mode Frequency (cm-1)

1 29.00

2 37.90

3 44.13

4 58.30

5 61.32

6 72.67

7 74.52

8 82.23

9 88.08

10 93.80

11 95.52

12 107.59

13 118.88

14 138.06

15 139.71

16 146.42

17 159.02

18 167.33

19 180.45

20 202.74

21 214.61

22 221.52

23 234.86

24 245.72

25 265.95

26 281.89

27 287.97

28 290.02

29 294.42

30 307.19

31 315.89

32 321.53

33 351.60

34 361.94

35 420.06

36 421.51

37 426.87

38 429.48

39 435.80

40 436.78

41 446.45

42 446.60

43 502.22

44 514.97

45 522.61

46 525.62

47 529.12

48 532.57

49 540.03

50 548.15

51 554.94

52 561.17

53 587.56

54 592.73

55 626.39

56 635.49

57 639.09

58 639.38

59 642.46

60 643.22

61 646.81

62 651.32

63 655.72

64 679.10

65 701.04

66 705.46

67 732.12

68 738.35

69 739.89

70 744.95

71 782.30

72 790.32

73 798.04

74 803.70

75 805.90

76 811.41

77 817.60

78 829.35

79 831.81

80 832.67

81 841.03

82 847.14

83 865.13

84 879.47

85 894.98

86 897.47

87 909.70

88 920.25

89 922.90

90 924.37

91 926.91

92 927.91

93 928.81

94 946.71

95 952.12

96 957.90

97 971.27

98 984.85

99 985.94

100 987.46

101 998.05

102 1003.33

103 1006.29

104 1008.23

105 1010.56

106 1014.30

107 1015.43

108 1016.26

109 1017.09

110 1017.64

111 1026.00

112 1028.26

113 1029.39

114 1032.21

115 1035.14

116 1039.14

117 1039.75

118 1040.58

119 1046.35

120 1047.01

121 1047.47

122 1052.14

123 1053.53

124 1055.01

125 1074.99

126 1075.16

127 1079.38

128 1080.20

129 1134.62

130 1135.94

131 1137.66

132 1142.88

133 1157.40

134 1159.05

135 1182.31

136 1184.93

137 1186.54

138 1193.78

139 1201.58

140 1204.01

141 1206.50

142 1209.85

143 1220.63

144 1220.97

145 1222.26

146 1223.10

147 1228.99

148 1236.14

149 1245.93

150 1246.54

151 1258.26

152 1260.91

153 1261.26

154 1264.78

155 1290.70

156 1292.16

157 1308.84

158 1318.89

159 1322.64

160 1328.31

161 1334.04

162 1335.81

163 1388.26

164 1394.53

165 1396.48

166 1399.65

167 1401.12

168 1405.65

169 1428.66

170 1436.92

171 1450.75

172 1454.39

173 1485.36

174 1485.92

175 1495.90

176 1496.97

177 1498.57

178 1499.99

179 1528.10

180 1529.34

181 1558.11

182 1559.07

183 1562.00

184 1562.49

185 1564.11

186 1564.98

187 1640.45

188 1641.62

189 1642.41

190 1642.92

191 1648.51

192 1648.99

193 1662.48

194 1663.19

195 1664.33

196 1665.06

197 1666.65

198 1668.07

199 1681.23

200 1681.54

201 3031.94

202 3032.04

203 3032.78

204 3032.91

205 3033.02

206 3033.93

207 3040.59

208 3040.69

209 3043.22

210 3043.25

211 3043.30

212 3043.99

213 3044.39

214 3044.67

215 3053.09

216 3053.28

217 3058.81

218 3059.59

219 3060.06

220 3060.47

221 3062.85

222 3063.49

223 3081.95

224 3081.97

225 3083.84

226 3084.27

227 3085.09

228 3086.79

229 3103.56

230 3103.86

231 3104.85

232 3113.80

233 3114.89

234 3115.77

### Table S2. Optimized geometries (in XYZ format) for target species at the M06-2X/6-31+G(d,p) level of theory.

C18H14 (**1**)

C 0.00000000 0.00000000 0.00000000

C 1.07346700 -0.88595500 0.62385900

C 2.13415200 -0.07070600 1.06326400

C 1.95855600 1.28272300 0.69563500

C 0.72245200 1.37992500 -0.18137800

H 0.07457500 2.21811000 0.08518600

H 1.02789700 1.50957600 -1.22620500

C 2.87596500 2.20702600 1.12407600

C 3.98467200 1.75830900 1.90092600

C 4.17281800 0.43092800 2.22286100

C 3.23036500 -0.54740300 1.80142800

C 3.26089800 -1.94865500 2.04679300

C 2.24035700 -2.75310200 1.58447200

C 1.11895100 -2.23438500 0.87755400

H 0.31026800 -2.89097200 0.57096800

H 2.28569200 -3.82316900 1.76685500

H 4.09509800 -2.37178700 2.59872100

H 5.04841900 0.12960800 2.79079200

H 4.71499600 2.48480900 2.23925200

H 2.77458100 3.26253600 0.88540200

C -1.21464900 0.09488700 0.90365400

C -2.44726200 -0.42637300 0.50906700

C -3.55908600 -0.32390800 1.34590900

C -3.45442000 0.30293600 2.58467800

C -2.22430700 0.82321300 2.98995800

C -1.11772500 0.71493400 2.15571400

H -0.15739600 1.12335300 2.46710200

H -2.12128200 1.32432500 3.94768900

H -4.32756300 0.37034900 3.22578800

H -4.51454800 -0.73880200 1.03662700

H -2.54650400 -0.92365100 -0.45310100

H -0.32818800 -0.41120900 -0.95988600

C18H14 

C 0.00000000 0.00000000 0.00000000

C 1.08961000 -0.88054500 0.33183100

C 2.42910400 -0.40251600 0.54334800

C 2.76775400 0.99756900 0.77136700

C 1.84451400 1.97856900 1.14135700

H 0.82203500 1.73848300 1.40109000

H 2.19202400 2.98791800 1.33574400

C 4.14408700 1.36003600 0.75696400

C 5.15590300 0.40644000 0.71601900

C 4.83839900 -0.93713900 0.66166900

C 3.48361400 -1.36308700 0.57579700

C 3.19826900 -2.75043000 0.52078700

C 1.90036800 -3.19832100 0.40758000

C 0.86216500 -2.26803400 0.30908900

H -0.14351700 -2.62367200 0.10395200

H 1.66864400 -4.25555900 0.33149300

H 4.03253600 -3.44681300 0.55940000

H 5.62162500 -1.69077200 0.67756000

H 6.19047800 0.72831800 0.78443000

H 4.40706700 2.40347800 0.90313800

C -1.38320500 -0.21640900 0.33766600

C -2.40576800 0.38130100 -0.43163700

C -3.74167100 0.21374100 -0.09356300

C -4.09215900 -0.52325800 1.04016400

C -3.09427000 -1.10282700 1.82646300

C -1.75888200 -0.95743700 1.48187700

H -0.98153400 -1.38847500 2.10347700

H -3.37041600 -1.63113400 2.73444600

H -5.13161100 -0.65802100 1.32065900

H -4.51930900 0.66348100 -0.70072100

H -2.12419800 0.93318200 -1.32522700

H 0.24796700 0.90393600 -0.55010900

C24H18 (**2**)

C 0.00000000 0.00000000 0.00000000

C -1.46041000 -0.41618100 0.06611100

C -2.24630200 0.60813300 -0.50258400

C -1.45866100 1.63141500 -1.07073900

C 0.00085000 1.21257500 -1.00466800

C 0.98424200 2.29978200 -0.63601100

C 2.13693200 2.52011300 -1.39096000

C 3.05073700 3.50852200 -1.01881700

C 2.82302400 4.28014000 0.11784200

C 1.67125200 4.06827300 0.87793000

C 0.76094600 3.08659200 0.50099600

H -0.15131600 2.91449400 1.07120200

H 1.47293200 4.64822200 1.77519100

H 3.53019000 5.04572900 0.42443500

H 3.95197400 3.68464200 -1.60006600

H 2.33278200 1.93374200 -2.28638500

H 0.28287900 0.82931900 -1.99511300

C -2.08210500 2.72424900 -1.61651300

C -3.50735700 2.76354000 -1.61172800

C -4.27668000 1.74711500 -1.08802800

C -3.65403600 0.60925700 -0.50341300

C -4.27881300 -0.52804800 0.08000100

C -3.51126800 -1.54536400 0.60463700

C -2.08600400 -1.50837300 0.61090900

H -1.53187100 -2.33387900 1.04705700

H -3.99964300 -2.41534000 1.03283000

H -5.36330600 -0.59769600 0.11281800

H -5.36113600 1.81742000 -1.12287500

H -3.99383200 3.63383300 -2.04140800

H -1.52618700 3.54874200 -2.05244000

C 0.97997600 -1.08999500 -0.36979000

C 2.13079600 -1.31726800 0.38595000

C 3.04102000 -2.30831900 0.01186500

C 2.81131000 -3.07594700 -1.12708600

C 1.66103900 -2.85754900 -1.88760800

C 0.75433700 -1.87328300 -1.50875200

H -0.15665700 -1.69598000 -2.07940400

H 1.46111800 -3.43417900 -2.78664800

H 3.51651100 -3.84257700 -1.43539700

H 3.94085000 -2.48977900 0.59366600

H 2.32831700 -0.73411300 1.28311000

H 0.28370800 0.38215400 0.99038600

C24H18 

C 0.00000000 0.00000000 0.00000000

C -0.07608300 1.39408000 0.32640500

C -1.34325500 2.07768000 0.49387400

C -2.60973300 1.39372300 0.66267500

C -2.68402200 0.00003500 0.99261200

C -3.78553600 -0.90067800 0.77515000

C -3.84098500 -2.10270600 1.52020900

C -4.86122900 -3.02288200 1.32810700

C -5.85475600 -2.78422400 0.37492300

C -5.80189700 -1.61891700 -0.39368300

C -4.78567100 -0.69181100 -0.20394700

H -4.73545000 0.18683000 -0.83735900

H -6.55222600 -1.43949700 -1.15618800

H -6.65052500 -3.50444400 0.22167200

H -4.88213700 -3.93294000 1.91750900

H -3.07007900 -2.29472200 2.26041500

H -1.82821200 -0.42404800 1.50908800

C -3.78941200 2.15929800 0.65122900

C -3.77100800 3.55516700 0.55453000

C -2.56889500 4.22366700 0.50736600

C -1.34383900 3.50596100 0.49210800

C -0.11935300 4.22471900 0.47504000

C 1.08326600 3.55703300 0.42882000

C 1.10291500 2.16104600 0.33528400

H 2.05028300 1.66099800 0.17052400

H 2.01818900 4.10608900 0.41203200

H -0.15307800 5.30997200 0.49287000

H -2.53600300 5.30890900 0.48727700

H -4.70639300 4.10348400 0.56966800

H -4.73641400 1.65845700 0.81612900

C 1.10317800 -0.89872600 0.21395200

C 1.15853400 -2.10007500 -0.53208600

C 2.18136100 -3.01829300 -0.34425100

C 3.17758000 -2.77826200 0.60573300

C 3.12474200 -1.61379400 1.37557400

C 2.10591100 -0.68865700 1.19000300

H 2.05584100 0.18915000 1.82458800

H 3.87715800 -1.43357000 2.13583200

H 3.97538000 -3.49694800 0.75587900

H 2.20215500 -3.92781100 -0.93449100

H 0.38555900 -2.29296800 -1.26994300

H -0.85828700 -0.42699100 -0.51172100

C30H22 (**3**)

C 0.00000000 0.00000000 0.00000000

C -1.51059000 -0.06960800 0.26528800

C -2.10365100 1.11441700 -0.21931500

C -1.21672500 1.89885100 -0.98837000

C 0.04051600 1.07394000 -1.19143400

C 1.34896500 1.76044200 -1.48882100

C 2.23332400 1.12460400 -2.36882100

C 3.47647800 1.67413300 -2.66171100

C 3.84428600 2.89528100 -2.10009200

C 2.96047500 3.56037800 -1.25428100

C 1.72071200 2.99719400 -0.95044800

H 1.03428800 3.52906200 -0.30256300

H 3.23818700 4.52466800 -0.83848500

H 4.81124500 3.32525800 -2.34525200

H 4.15174100 1.15749800 -3.33385600

H 1.93945700 0.17381600 -2.80657500

H -0.19202600 0.46933500 -2.08137800

C -1.63394400 3.11576000 -1.45943500

C -2.95660900 3.55157700 -1.14434000

C -3.82661800 2.77936000 -0.40885500

C -3.41624800 1.50594400 0.08034400

C -4.18574000 0.60524100 0.86203200

C -3.62766300 -0.58287500 1.28619000

C -2.27730000 -0.93245400 1.01098200

H -1.87223300 -1.85875400 1.41152500

H -4.22568200 -1.26944000 1.87438400

H -5.20167600 0.87142300 1.14254500

H -4.82267900 3.14447400 -0.17043800

H -3.28582800 4.52399600 -1.50226600

H -0.97958100 3.74355800 -2.05327800

C 0.65983900 -1.28373400 -0.48575400

C 2.06147000 -1.36593800 -0.50969400

C 2.70380800 -2.48598100 -1.02532300

C 1.95694100 -3.54741600 -1.53434800

C 0.56584300 -3.47341700 -1.52841100

C -0.07594100 -2.34441100 -1.01698600

H -1.16101200 -2.28771500 -1.03773000

H -0.01356500 -4.29668600 -1.93414700

H 2.44440600 -4.43211300 -1.93138900

H 3.78994500 -2.52888500 -1.03335600

H 2.63711500 -0.53576200 -0.11025700

C 0.58581400 0.50830200 1.33607800

C 1.24985300 -0.35226900 2.21816000

C 1.64649400 0.07760900 3.48483300

C 1.37726400 1.37377800 3.90880500

C 0.70372700 2.23789700 3.04834700

C 0.31443200 1.80823800 1.78394700

H -0.23754200 2.49785100 1.15920800

H 0.44995200 3.24326000 3.37342500

H 1.68609100 1.71099200 4.89461100

H 2.16110600 -0.61515100 4.14060900

H 1.47853000 -1.36809600 1.91424200

C30H22 

C 0.00000000 0.00000000 0.00000000

C -0.21982800 1.39855200 -0.40198100

C -1.51017000 2.03010600 -0.45608800

C -2.78382400 1.31036200 -0.51875200

C -2.86306900 -0.03999400 -0.91603700

C -4.06594000 -0.82467100 -1.17644700

C -4.04861000 -2.19495800 -0.84807200

C -5.15235100 -3.00581400 -1.08190600

C -6.29884600 -2.47592900 -1.67615700

C -6.32029100 -1.13115400 -2.04456500

C -5.22059700 -0.31403300 -1.80072600

H -5.23544900 0.71828700 -2.13488500

H -7.19608000 -0.71748600 -2.53502600

H -7.16063400 -3.10854600 -1.86207800

H -5.12019100 -4.05359500 -0.80036300

H -3.15866600 -2.60832400 -0.38044300

H -1.93890700 -0.58269000 -1.07122600

C -3.95824900 2.04407200 -0.22842300

C -3.95684100 3.43594200 -0.10672300

C -2.78844300 4.14376300 -0.29150600

C -1.55214800 3.45780200 -0.46378800

C -0.35660100 4.20544400 -0.61588100

C 0.85854600 3.57210700 -0.72903000

C 0.92298000 2.17696300 -0.59688500

H 1.89124600 1.68752300 -0.57325900

H 1.77228100 4.14374700 -0.85582800

H -0.42235000 5.28957600 -0.63853300

H -2.78281300 5.22919900 -0.27411000

H -4.88851900 3.95559600 0.09364900

H -4.89343200 1.50802800 -0.12234000

C -0.67704400 -0.52614600 1.18101600

C -0.92317800 -1.90846400 1.33169300

C -1.61744000 -2.40107300 2.42986400

C -2.08647500 -1.53174600 3.41590100

C -1.84678600 -0.16268100 3.28907600

C -1.15476900 0.33433500 2.19196800

H -0.96938200 1.40112500 2.11741400

H -2.19839200 0.52311200 4.05375200

H -2.63155700 -1.91550300 4.27154200

H -1.80602000 -3.46746000 2.50799700

H -0.59002500 -2.59226300 0.55577800

C 0.96806100 -0.80302300 -0.74174700

C 1.79631700 -1.75117300 -0.10624200

C 2.71521300 -2.49951000 -0.83287700

C 2.83067700 -2.33125600 -2.21395200

C 2.02426400 -1.39289200 -2.85961500

C 1.11225900 -0.63436600 -2.13553300

H 0.48481600 0.09030100 -2.64542100

H 2.10095000 -1.25601700 -3.93397200

H 3.54241800 -2.92230700 -2.77999500

H 3.35064000 -3.21149700 -0.31720600

H 1.73276300 -1.87396100 0.97076500

C36H26 (**4**)

C 0.00000000 0.00000000 0.00000000

C 0.24402700 -0.22612300 -1.66750100

C 0.28937800 -1.74827300 -1.77730400

C -0.01605900 -2.36001300 -0.54832700

C -0.18281500 -1.43401100 0.49521500

C -0.54956000 -1.91129100 1.73136100

C -0.71464200 -3.31119100 1.90900700

C -0.52832200 -4.22019100 0.88893200

C -0.15745200 -3.75613500 -0.40019100

C 0.08174200 -4.54957900 -1.55415300

C 0.45718000 -3.95274400 -2.73828500

C 0.57330100 -2.53990200 -2.86140900

H 0.86741600 -2.11316500 -3.81757900

H 0.67656600 -4.55624400 -3.61498400

H -0.03441600 -5.62824100 -1.48919600

H -0.68742300 -5.27787800 1.07581100

H -1.01495300 -3.67140700 2.89009000

H -0.74608800 -1.25167500 2.57396100

C -0.95095900 0.35055100 -2.44196100

C -1.27483300 1.71209400 -2.32807900

C -2.44715700 2.22948000 -2.86484000

C -3.31954200 1.39677300 -3.56726900

C -2.98202100 0.06283600 -3.74961400

C -1.81323500 -0.45508100 -3.18624400

H -1.59428800 -1.50660400 -3.32260300

H -3.63950600 -0.59704500 -4.30341700

H -4.25713500 1.78304700 -3.95662400

H -2.71163800 3.26597800 -2.68127500

H -0.63166900 2.36946300 -1.75487300

C 1.59022100 0.30441800 -2.18163100

C 1.71138600 1.29497600 -3.15687500

C 2.96908300 1.74268700 -3.56949000

C 4.12772200 1.20505300 -3.02175800

C 4.02140300 0.18608800 -2.07349200

C 2.77147700 -0.26316900 -1.67567600

H 2.70439500 -1.06167100 -0.94074300

H 4.91875800 -0.25066700 -1.64712600

H 5.10365200 1.55967100 -3.34177000

H 3.03627300 2.51750200 -4.32837900

H 0.82306100 1.72647000 -3.60215400

C 1.21092300 0.68306100 0.65374100

C 1.63952900 1.95039700 0.22319600

C 2.75267200 2.56890200 0.77982200

C 3.46767700 1.93789700 1.79879500

C 3.05227600 0.68958500 2.24455200

C 1.93899000 0.06890900 1.67355800

H 1.65200000 -0.91394300 2.02927200

H 3.58682000 0.18913600 3.04490900

H 4.34879900 2.40539000 2.22669900

H 3.07316200 3.53865200 0.40795700

H 1.12461700 2.44132300 -0.59725700

C -1.31602300 0.73039700 0.33825400

C -1.36768300 1.98689400 0.94621500

C -2.59111200 2.61263700 1.19679900

C -3.78852200 1.99699700 0.85740300

C -3.75485600 0.72022200 0.28828800

C -2.53742700 0.10264000 0.04226000

H -2.53177600 -0.89156800 -0.39704400

H -4.68370700 0.22912800 0.01467700

H -4.74188800 2.46898900 1.07582300

H -2.59819800 3.59919200 1.65143000

H -0.44984900 2.47739500 1.24613400

C36H26 

C 0.00000000 0.00000000 0.00000000

C 0.03361200 -1.42751800 0.37862400

C -1.02096800 -2.10061000 1.10231700

C -2.07862000 -1.43983900 1.83281300

C -2.05157400 -0.01526600 2.22411400

C -0.86562300 0.47230300 2.93107700

C -0.41386000 1.80099500 2.80158800

C 0.73718300 2.23710100 3.44174000

C 1.46972900 1.36968900 4.24981700

C 1.02813400 0.05735100 4.41380100

C -0.11353200 -0.38862800 3.75426600

H -0.45457200 -1.40729400 3.91381500

H 1.57778900 -0.63044200 5.04566200

H 2.39037900 1.70811400 4.71498800

H 1.09210400 3.24619700 3.25480000

H -0.95031300 2.48487700 2.15701000

C -3.23614500 0.79794100 2.03796600

C -3.48817900 1.96873400 2.79039100

C -4.63586900 2.72346800 2.57665700

C -5.57830000 2.33555000 1.62073600

C -5.35432200 1.17567300 0.87744200

C -4.20299000 0.42880600 1.07338400

H -4.00775700 -0.45677400 0.47567900

H -6.06409400 0.85013000 0.12154900

H -6.48380100 2.91041500 1.44751500

H -4.81839800 3.62679400 3.15272500

H -2.79733600 2.28188000 3.56688700

C -3.12622200 -2.20108800 2.33315800

C -3.15693800 -3.60629600 2.23256400

C -2.09947000 -4.26046300 1.65932700

C -1.01822000 -3.53339300 1.09502500

C 0.06619500 -4.25009200 0.52326800

C 1.12108100 -3.58534700 -0.04198900

C 1.08494900 -2.17937300 -0.12765400

H 1.88288100 -1.66676400 -0.65465400

H 1.96461000 -4.11820600 -0.46828000

H 0.03930900 -5.33672500 0.55701900

H -2.06858900 -5.34632300 1.61129200

H -3.99802600 -4.14697400 2.65401500

H -3.92654800 -1.69616800 2.86439500

C -1.18872500 0.48869500 -0.70127500

C -1.64401400 1.81532100 -0.56318700

C -2.79559600 2.25286300 -1.20143500

C -3.52554300 1.38872900 -2.01554200

C -3.08090100 0.07842700 -2.18731100

C -1.93850200 -0.36899000 -1.52996100

H -1.59531600 -1.38605900 -1.69503900

H -3.62876000 -0.60650300 -2.82387500

H -4.44645000 1.72798700 -2.47968400

H -3.15246000 3.26039100 -1.00950400

H -1.10923300 2.49690300 0.08537700

C 1.18225700 0.81595100 0.18981300

C 1.43025400 1.99122500 -0.55653600

C 2.57713300 2.74700500 -0.34169200

C 3.52244800 2.35554100 0.60997400

C 3.30162700 1.19183500 1.34821600

C 2.15145600 0.44388300 1.15074600

H 1.95849800 -0.44459600 1.74476700

H 4.01368500 0.86409400 2.10094300

H 4.42747500 2.93096100 0.78399800

H 2.75715700 3.65341900 -0.91372200

H 0.73683300 2.30712700 -1.32953200

**HPE**

C 0.00000000 0.00000000 0.00000000

C -1.58061400 0.12668200 -0.61225200

C -1.63654600 0.80284000 -2.00631300

C -2.51444000 0.33289700 -2.99072300

C -2.72706000 1.03393800 -4.17828300

C -2.06330700 2.23131500 -4.41547700

C -1.17969800 2.71382600 -3.45040400

C -0.97718500 2.01404500 -2.26671300

H -0.26757700 2.41509000 -1.55171800

H -0.63696800 3.63878900 -3.62581100

H -2.22844700 2.78321400 -5.33260600

H -3.43407000 0.64434100 -4.90619300

H -3.08150500 -0.57513200 -2.81836400

C -2.21716600 -1.28992200 -0.74186400

C -3.40897600 -1.66016600 -0.11567200

C -3.92409600 -2.95701900 -0.23792200

C -3.27525900 -3.91259800 -1.00697200

C -2.10570700 -3.54960000 -1.67694000

C -1.60261400 -2.26396800 -1.54792400

H -0.69089200 -2.02772100 -2.07831800

H -1.55814300 -4.25555700 -2.29576500

H -3.66493200 -4.92235400 -1.10073900

H -4.83496200 -3.21078200 0.29586600

H -3.97756300 -0.96985500 0.49617400

C -2.55059700 0.95793400 0.29005000

C -3.47504900 1.85022100 -0.26859500

C -4.43444600 2.49633300 0.51417000

C -4.51552200 2.26487900 1.88037400

C -3.60601900 1.38090700 2.45845500

C -2.64788300 0.74991200 1.67474600

H -1.93577500 0.11393100 2.18221500

H -3.65056500 1.17867500 3.52413300

H -5.26399300 2.76111500 2.49127300

H -5.13560700 3.17163400 0.03138200

H -3.45781600 2.06440000 -1.32986900

C 0.28389400 -1.47058100 0.41991000

C 1.32841200 -2.23041400 -0.11125700

C 1.48251400 -3.58346700 0.21408600

C 0.61478700 -4.20595000 1.09975400

C -0.38934300 -3.44566300 1.69971300

C -0.53260200 -2.10484000 1.37196000

H -1.33187300 -1.55771200 1.85277500

H -1.08668000 -3.87949400 2.41054400

H 0.73175500 -5.25903300 1.33782900

H 2.28124900 -4.14610000 -0.25906700

H 2.04235400 -1.81218700 -0.80979100

C 0.23608600 0.91563900 1.22623500

C 0.98844900 0.47651700 2.32122400

C 1.34948500 1.34837800 3.35070000

C 0.96310800 2.68297500 3.31356500

C 0.21043600 3.13797300 2.23117000

C -0.13648100 2.26787200 1.20538700

H -0.74595800 2.64786800 0.39434000

H -0.12452800 4.17097600 2.19170300

H 1.23947300 3.35836800 4.11415800

H 1.95827700 0.98158900 4.17237000

H 1.34088700 -0.54917000 2.36467900

C 1.10883600 0.38925700 -1.03009100

C 1.12440900 -0.10976500 -2.34201300

C 2.18319300 0.11466100 -3.21327900

C 3.28328200 0.86721800 -2.80390500

C 3.28524500 1.38694100 -1.51707700

C 2.22172300 1.14853900 -0.64374300

H 2.27253200 1.58005000 0.34815700

H 4.13174000 1.96671200 -1.16147100

H 4.11018900 1.04502200 -3.48489800

H 2.15957300 -0.31037900 -4.21201900

H 0.27661700 -0.65584000 -2.73102000

TPM

C 0.089138 -0.098832 0.803738

C 1.316482 -0.866553 0.321412

C 2.590603 -0.418135 0.690730

C 3.732371 -1.114557 0.308021

C 3.622489 -2.279025 -0.454894

C 2.362588 -2.735728 -0.821257

C 1.216963 -2.034507 -0.435354

H 0.239076 -2.403106 -0.732032

H 2.243826 -3.654183 -1.389426

H 4.521161 -2.801429 -0.768040

H 4.711270 -0.750229 0.608025

H 2.700803 0.504918 1.256589

C -1.228610 -0.664182 0.282085

C -2.017265 -1.478822 1.094723

C -3.238297 -1.978935 0.638664

C -3.682989 -1.673892 -0.644595

C -2.894219 -0.873928 -1.470209

C -1.680296 -0.372679 -1.009528

H -1.088067 0.265793 -1.654583

H -3.237852 -0.612877 -2.467711

H -4.641076 -2.045851 -0.997603

H -3.841357 -2.598931 1.290724

H -1.668558 -1.736241 2.093020

C 0.140256 1.394566 0.503159

C -0.523209 2.284433 1.351445

C -0.668508 3.624976 1.004615

C -0.146437 4.095690 -0.199482

C 0.553086 3.225359 -1.031875

C 0.707423 1.886787 -0.675180

H 1.247353 1.209236 -1.328796

H 0.960771 3.582551 -1.973514

H -0.308090 5.125617 -0.500243

H -1.198998 4.299378 1.666628

H -0.946921 1.915144 2.283177

H 0.062888 -0.212610 1.896638

TPM 

C -0.000884 0.000332 0.026642

C -1.010925 -1.048946 0.026367

C -2.311512 -0.826333 -0.480909

C -3.274587 -1.827637 -0.478157

C -2.973211 -3.095491 0.016976

C -1.694520 -3.342890 0.516180

C -0.732545 -2.341012 0.527272

H 0.249645 -2.567054 0.930885

H -1.432171 -4.325377 0.898905

H -3.720789 -3.884122 0.013264

H -4.263349 -1.600411 -0.866260

H -2.570751 0.147652 -0.884564

C 1.425535 -0.341089 0.006190

C 1.905164 -1.468519 -0.691412

C 3.251836 -1.811703 -0.660086

C 4.158815 -1.032116 0.055565

C 3.710012 0.105521 0.727219

C 2.363393 0.449070 0.699629

H 2.017283 1.337785 1.219480

H 4.412463 0.718422 1.279504

H 5.206612 -1.315320 0.095195

H 3.596708 -2.701157 -1.178839

H 1.206704 -2.068441 -1.262916

C -0.397189 1.411997 0.026751

C 0.366192 2.366788 -0.673913

C -0.039560 3.693763 -0.749589

C -1.213408 4.106603 -0.119122

C -1.965133 3.186306 0.609167

C -1.558110 1.859137 0.691346

H -2.137868 1.149001 1.269319

H -2.882512 3.504036 1.095556

H -1.546364 5.135619 -0.213775

H 0.551347 4.409390 -1.308907

H 1.279586 2.047078 -1.166449

DPNM

C 0.984011 -0.017148 -0.032351

C 1.404865 1.386753 0.012071

C 2.559274 1.841302 -0.660195

C 2.997018 3.154649 -0.526973

C 2.282987 4.057052 0.258901

C 1.116690 3.639029 0.900088

C 0.683067 2.325442 0.777297

H -0.220705 2.002781 1.284466

H 0.553882 4.337602 1.507574

H 2.638440 5.073355 0.395898

H 3.910617 3.474847 -1.018809

H 3.112198 1.149465 -1.284700

C 1.976411 -1.082746 -0.109706

C 1.650993 -2.347078 -0.649359

C 2.588016 -3.371651 -0.691042

C 3.885207 -3.173881 -0.216117

C 4.233124 -1.931873 0.311863

C 3.294702 -0.908719 0.368870

H 3.582164 0.046501 0.796760

H 5.234092 -1.738866 0.685632

H 4.606866 -3.985074 -0.256816

H 2.296616 -4.337828 -1.094084

H 0.655142 -2.538894 -1.037570

C -0.438956 -0.341238 0.072178

C -1.408853 0.485072 -0.480621

C -2.791650 0.208660 -0.349315

C -3.203598 -0.956799 0.354964

C -2.204661 -1.800637 0.919312

C -0.877208 -1.506327 0.784284

H -0.128534 -2.136606 1.250641

H -2.521977 -2.693258 1.452571

C -4.587148 -1.230690 0.485893

C -5.524401 -0.385323 -0.058436

C -5.117891 0.779907 -0.753259

C -3.783786 1.068464 -0.899688

H -3.460556 1.972644 -1.408890

H -5.869508 1.434661 -1.181559

H -6.578082 -0.616294 0.062245

H -4.899738 -2.137221 0.997915

H -1.101728 1.386115 -1.006290

**5**

C 0.00000000 0.00000000 0.00000000

C 1.21545400 0.01562200 -1.19739500

C 1.28602600 -1.33612500 -1.95046300

C 1.48350500 -1.38788200 -3.33447500

C 1.73715300 -2.60041200 -3.98358800

C 1.80598500 -3.78982000 -3.26915100

C 1.59972600 -3.75760700 -1.89004400

C 1.34580500 -2.55027100 -1.25210500

H 1.14704300 -2.57877800 -0.18823300

H 1.64948300 -4.67573000 -1.31356300

H 2.04073700 -4.73180900 -3.75582200

H 1.91795400 -2.59907100 -5.05391100

H 1.47594500 -0.47134100 -3.91345800

C 0.91617000 1.16152700 -2.20386400

C 1.78719300 2.22916900 -2.43976200

C 1.40360700 3.30857800 -3.24437800

C 0.15485500 3.33583600 -3.85082600

C -0.69816100 2.24468700 -3.68586700

C -0.30690800 1.17673100 -2.89176400

H -0.99968600 0.36014000 -2.75276400

H -1.68297100 2.22987700 -4.14303400

H -0.16215500 4.20116400 -4.42525900

H 2.08469000 4.14194600 -3.39025900

H 2.77328500 2.26643600 -1.99218800

C 2.66383900 0.25542800 -0.66015400

C 3.74267600 -0.41026300 -1.20638200

C 5.08682600 -0.11292500 -0.84915800

C 5.35217800 0.90934000 0.09718500

C 4.24033800 1.58435200 0.66735900

C 2.95956200 1.26782800 0.30653400

H 2.15138400 1.78186800 0.80340200

H 4.42734000 2.35876200 1.40743200

C 6.69507400 1.21556800 0.42872000

C 7.73043900 0.53213900 -0.16261900

C 7.47004800 -0.49666300 -1.10216000

C 6.17646100 -0.81335400 -1.43497600

H 5.95030100 -1.60692400 -2.14437000

H 8.30392500 -1.02056900 -1.55763500

H 8.75202300 0.78970700 0.10030800

H 6.90678600 2.01043000 1.14009500

H 3.59931000 -1.19308800 -1.94329800

C -0.89075500 1.27101200 -0.13716700

C -2.26087800 1.21813800 -0.41090300

C -3.02134900 2.37916000 -0.57511700

C -2.44021400 3.63189300 -0.43546900

C -1.08023100 3.70480000 -0.12874200

C -0.33139600 2.54773700 0.01975700

H 0.71874600 2.66501000 0.24462200

H -0.61474500 4.67371400 0.03044000

H -3.00943800 4.54310800 -0.59404500

H -4.07228600 2.28020000 -0.83021000

H -2.74234600 0.25934200 -0.56489700

C 0.58819300 -0.03612500 1.43737400

C -0.00792800 0.68291700 2.48212800

C 0.41619800 0.53484300 3.80437600

C 1.46195900 -0.32935000 4.11288700

C 2.07209600 -1.04732800 3.08673500

C 1.63654800 -0.90505400 1.77420700

H 2.15473200 -1.45316700 1.00093600

H 2.91210000 -1.69753600 3.31610800

H 1.79220000 -0.47028800 5.13718900

H -0.08523700 1.08274700 4.59474100

H -0.85962700 1.32026800 2.26857300

C -0.96865600 -1.22564700 -0.09604600

C -1.48089700 -1.71419000 -1.31017600

C -2.45581500 -2.70386700 -1.35548600

C -2.96345800 -3.25312100 -0.17970000

C -2.47039200 -2.79419200 1.03402400

C -1.49138900 -1.80061100 1.07104100

H -1.14919300 -1.47148600 2.04514800

H -2.84122400 -3.19274600 1.97389100

H -3.72630700 -4.02554800 -0.21401900

H -2.81090900 -3.04724000 -2.32332800

H -1.10991500 -1.35380100 -2.25961200

**Structure 6**

C 0.00000000 0.00000000 0.00000000

C 0.85160900 0.47385100 1.44264100

C 0.28166800 1.75846400 2.12046500

C 0.14003300 1.82833700 3.51220800

C -0.28147800 2.99925500 4.14805800

C -0.56228400 4.14347400 3.41484800

C -0.39644200 4.10744800 2.02880800

C 0.01603500 2.93814200 1.40532000

H 0.12685200 2.95975100 0.33002600

H -0.61723500 4.99593200 1.44387300

H -0.89990700 5.05764700 3.89228800

H -0.39664600 3.00156600 5.22786700

H 0.38862900 0.96533700 4.11716900

C 0.77903700 -0.65405100 2.49788700

C 1.91526800 -1.20320600 3.09728600

C 1.81623000 -2.22242900 4.04914500

C 0.57335800 -2.69315600 4.44947700

C -0.57563400 -2.12154800 3.89841300

C -0.46799800 -1.12321100 2.94282000

H -1.38473700 -0.73490700 2.51577700

H -1.55943000 -2.46610500 4.20509900

H 0.48962000 -3.49442500 5.17827900

H 2.72947400 -2.63433800 4.46764100

H 2.90261600 -0.85558000 2.81229600

C 2.33899300 0.79352700 1.11599600

C 2.91898500 1.98391000 1.48781500

C 4.26022400 2.32337100 1.16238500

C 5.07242300 1.40212200 0.45783300

C 4.49492100 0.14357200 0.13249200

H 5.09170200 -0.60126800 -0.38403400

C 3.19485100 -0.14378700 0.44982500

H 2.81127900 -1.11212100 0.15480100

C 6.39888500 1.77062500 0.11450800

C 6.89293200 3.00636100 0.46063600

C 6.08256400 3.92219100 1.17406800

C 4.79635400 3.58694400 1.51718500

H 4.16921200 4.28972600 2.05577900

H 6.47950300 4.89402500 1.45358400

H 7.90007700 3.29688600 0.17420800

H 7.01326000 1.06003000 -0.42871600

H 2.36783700 2.73547200 2.03492300

C -0.46708300 -1.47949500 0.07488400

C -1.76840300 -1.87370300 -0.25217500

C -2.18513600 -3.20142300 -0.11805800

C -1.30469900 -4.17276000 0.34496600

C 0.01519000 -3.81325500 0.61013500

C 0.42612100 -2.49874500 0.44575700

H 1.44553900 -2.24293500 0.69774000

H 0.72035100 -4.54723200 0.98878500

H -1.64559900 -5.18837900 0.51851900

H -3.20145900 -3.47624600 -0.38584900

H -2.48461900 -1.14754600 -0.61946900

C 0.93791900 0.16494200 -1.22330300

C 1.33276400 -0.91184900 -2.02417900

C 2.22849900 -0.74865900 -3.08320300

C 2.71731400 0.50926900 -3.40406600

C 2.28389800 1.60765500 -2.65828100

C 1.40795600 1.43314000 -1.59621200

H 1.08814800 2.31878300 -1.06226300

H 2.62852500 2.60463400 -2.91753700

H 3.39933600 0.65351300 -4.23692600

H 2.54654100 -1.62745800 -3.63663200

H 0.96902300 -1.90760400 -1.80540200

C -1.26576800 0.85958800 -0.24432200

C -2.12803100 1.19238200 0.77818800

C -3.27647400 1.99658800 0.58409600

C -3.62165200 2.41373900 -0.72594800

C -2.79071400 1.98313900 -1.79408500

C -1.65630200 1.24274500 -1.56053900

H -1.07229100 0.91778900 -2.41521000

H -3.06828400 2.26330700 -2.80741200

C -4.76661600 3.23435100 -0.90923600

C -5.51350400 3.64290700 0.16940700

C -5.14754000 3.25365900 1.48252000

C -4.06113900 2.44154800 1.68459300

H -3.76244700 2.13532900 2.68532700

H -5.71457300 3.61480700 2.33509800

H -6.40037700 4.24851400 0.00427500

H -5.04912000 3.54189200 -1.91341500

H -1.90193400 0.90117900 1.79404700

### Table S3. Optimized geometries (in XYZ format) and vibrational frequencies for reference species at the B3LYP/6-31G(d) level of theory.

CH4

C 0.00000000 0.00000000 0.00000000

H 0.63130600 0.63130600 0.63130600

H -0.63130600 -0.63130600 0.63130600

H -0.63130600 0.63130600 -0.63130600

H 0.63130600 -0.63130600 -0.63130600

Mode Frequency (cm-1)

1 1378.15

2 1378.17

3 1378.20

4 1600.83

5 1600.83

6 3055.30

7 3167.70

8 3167.79

9 3167.90

C2H6

C 0.00000000 0.00000000 0.00000000

C 1.53047000 -0.00046400 0.00001800

H 1.92931300 0.46614300 -0.90819900

H 1.92972800 0.55334200 0.85769400

H 1.92842400 -1.02024400 0.05022700

H -0.39923200 -0.55410800 -0.85749300

H -0.39887700 -0.46627400 0.90837100

H -0.39793000 1.01976900 -0.05059700

Mode Frequency (cm-1)

1 321.55

2 830.58

3 835.87

4 1010.65

5 1230.91

6 1235.96

7 1431.82

8 1456.97

9 1532.76

10 1535.91

11 1537.31

12 1541.30

13 3048.59

14 3049.80

15 3098.20

16 3101.20

17 3122.57

18 3125.30

C4H10

C 0.00000000 0.00000000 0.00000000

C 1.14500300 -0.90863500 -0.46895200

C 0.92980700 -2.35492700 -0.00023000

H -0.02758000 -2.75309300 -0.35682500

H 1.72437200 -3.01605100 -0.36614800

H 0.92686200 -2.41362400 1.09619900

C 2.50538100 -0.37282300 -0.00020800

H 2.67299500 0.65165800 -0.35405300

H 2.56295600 -0.35921900 1.09655700

H 3.32864500 -0.99691700 -0.36852800

H 1.14473500 -0.90887200 -1.56944900

H 0.12906900 1.02485600 -0.36785900

H -0.97093500 -0.36605600 -0.35525000

H -0.04111300 0.04123000 1.09670800

Mode Frequency (cm-1)

1 187.40

2 237.31

3 248.98

4 361.63

5 380.17

6 428.90

7 803.16

8 935.46

9 937.48

10 961.70

11 977.38

12 981.37

13 1201.79

14 1206.07

15 1221.94

16 1381.89

17 1388.92

18 1430.31

19 1432.99

20 1458.19

21 1512.62

22 1517.03

23 1518.82

24 1533.17

25 1536.98

26 1545.13

27 3020.19

28 3033.10

29 3033.93

30 3042.50

31 3093.84

32 3096.44

33 3105.08

34 3107.12

35 3109.21

36 3110.65

C4H9 

C 0.00000000 0.00000000 0.00000000

C 1.40772500 0.48466800 -0.16081900

C 1.69307500 1.94597800 0.00003300

H 0.91231200 2.56654600 -0.45849300

H 1.74358100 2.24466900 1.06463500

H 2.65599400 2.22421400 -0.44671300

C 2.53204900 -0.49225900 0.00001400

H 3.45509800 -0.13233300 -0.47281000

H 2.77816700 -0.67515500 1.06372900

H 2.28589800 -1.47021800 -0.43291600

H -0.72029600 0.66962200 -0.48797600

H -0.13287000 -1.00629900 -0.41693600

H -0.30213700 -0.05900500 1.06315100

Mode Frequency (cm-1)

1 119.79

2 148.15

3 183.53

4 262.00

5 366.79

6 391.56

7 762.18

8 951.05

9 957.20

10 980.35

11 1017.58

12 1019.56

13 1110.71

14 1307.49

15 1310.31

16 1427.49

17 1429.81

18 1455.84

19 1497.96

20 1502.65

21 1503.29

22 1518.43

23 1525.37

24 1527.40

25 2945.01

26 2945.74

27 2954.67

28 3048.60

29 3050.43

30 3054.36

31 3093.92

32 3098.55

33 3100.57

C6H6

C 0.00000000 0.00000000 0.00000000

C -0.46722000 1.31625200 -0.00000100

C 0.44006300 2.37795800 0.00001500

C 1.81367300 2.12439900 0.00000400

C 2.28089900 0.80814200 -0.00000400

C 1.37361500 -0.25356500 0.00001800

H 1.73592200 -1.27848900 0.00007700

H 3.34983100 0.60996900 -0.00005400

H 2.51859700 2.95170900 0.00000500

H 0.07777600 3.40289000 0.00004300

H -1.53615700 1.51440400 -0.00002000

H -0.70490600 -0.82732500 -0.00002900

Mode Frequency (cm-1)

1 416.44

2 421.54

3 621.28

4 622.60

5 690.09

6 720.42

7 858.05

8 862.92

9 961.07

10 966.32

11 1005.10

12 1020.10

13 1021.82

14 1066.09

15 1071.57

16 1186.26

17 1201.77

18 1215.02

19 1357.57

20 1386.64

21 1530.10

22 1532.26

23 1654.22

24 1658.47

25 3176.52

26 3183.74

27 3188.41

28 3200.13

29 3204.48

30 3212.83

C7H8

C 0.00000000 0.00000000 0.00000000

C -1.51189200 0.00255400 0.00000000

C -2.22849200 -1.20351200 0.00000000

C -3.62262600 -1.21053800 0.00000000

C -4.33061200 -0.00615000 0.00000000

C -3.63164400 1.20047500 0.00000000

C -2.23491600 1.20136700 0.00000000

H -1.69874200 2.14789400 0.00000000

H -4.17199900 2.14384200 0.00000000

H -5.41739600 -0.00999400 0.00000000

H -4.15825000 -2.15664600 0.00000000

H -1.68668700 -2.14744100 0.00000000

H 0.40043300 1.01802500 0.00000000

H 0.40004200 -0.51612600 0.88166400

H 0.40004200 -0.51612600 -0.88166400

Mode Frequency (cm-1)

1 122.01

2 217.28

3 340.09

4 415.14

5 482.25

6 525.27

7 639.38

8 713.32

9 745.16

10 801.61

11 855.72

12 906.65

13 956.66

14 986.38

15 1007.56

16 1019.72

17 1058.13

18 1077.64

19 1120.45

20 1193.57

21 1206.17

22 1240.97

23 1350.25

24 1364.17

25 1444.54

26 1493.27

27 1518.37

28 1534.68

29 1547.78

30 1647.81

31 1666.03

32 3044.25

33 3094.57

34 3127.20

35 3168.47

36 3170.00

37 3187.22

38 3193.89

39 3209.12

C7H7 

C 0.00000000 0.00000000 0.00000000

C 1.40669800 0.00014000 -0.00015300

C 2.14989700 -1.21800200 0.00026200

C 3.53569200 -1.21202500 0.00003200

C 4.24166300 -0.00009000 0.00027700

C 3.53584300 1.21194700 0.00044000

C 2.15003500 1.21814600 0.00032100

H 1.60817000 2.16082100 0.00045200

H 4.07886600 2.15371100 0.00039000

H 5.32800100 -0.00015900 0.00046000

H 4.07858000 -2.15386200 0.00025000

H 1.60783300 -2.16055900 0.00096000

H -0.56280700 -0.92794800 0.00268900

H -0.56294700 0.92788400 -0.00012300

Mode Frequency (cm-1)

1 201.75

2 352.42

3 389.87

4 480.46

5 500.12

6 533.10

7 628.85

8 680.83

9 699.85

1 772.71

1 832.98

1 834.46

1 894.67

1 957.39

1 981.80

1 982.46

1 996.55

1 1045.26

1 1127.36

2 1187.29

2 1197.40

2 1299.73

2 1347.27

2 1364.79

2 1490.53

2 1513.39

2 1523.69

2 1596.10

2 1617.23

3 3171.84

3 3178.25

3 3180.20

3 3192.73

3 3197.37

3 3210.94

3 3264.59

C8H18

C 0.00000000 0.00000000 0.00000000

C 1.58792400 -0.00250600 0.00216500

C 2.15662200 -0.16609700 -1.42601200

H 1.77641600 0.59583500 -2.11586400

H 3.24925600 -0.07058300 -1.40300500

H 1.92659400 -1.14786000 -1.85228500

C 2.15545500 1.31514000 0.57923500

H 1.94335600 2.17615500 -0.06358700

H 1.76657300 1.53635300 1.57951100

H 3.24623800 1.24037300 0.66887500

C 2.14810000 -1.15983300 0.85994200

H 1.76001800 -2.13704200 0.55031200

H 3.23961200 -1.19932200 0.76220400

H 1.92098200 -1.03100900 1.92321900

C -0.56202800 -1.19002300 -0.81106300

H -1.65255600 -1.23532900 -0.70111900

H -0.34823600 -1.10101800 -1.88167900

H -0.16242300 -2.14957700 -0.46503200

C -0.56489500 -0.11282200 1.43449700

H -1.65460300 0.01041000 1.41416700

H -0.35665600 -1.09051200 1.88170100

H -0.16277800 0.65450200 2.10509700

C -0.56070700 1.30033900 -0.61903100

H -1.65023400 1.22354400 -0.71949000

H -0.35619000 2.17487700 0.00691000

H -0.15396900 1.49710600 -1.61666300

Mode Frequency (cm-1)

1 96.81

2 214.20

3 249.45

4 281.15

5 290.61

6 306.80

7 315.63

8 325.07

9 332.75

10 377.59

11 383.23

12 390.03

13 394.00

14 402.14

15 466.65

16 477.31

17 492.17

18 644.70

19 801.55

20 884.73

21 929.59

22 933.86

23 938.39

24 939.53

25 959.75

26 970.05

27 1029.12

28 1029.52

29 1075.42

30 1079.70

31 1215.50

32 1217.30

33 1221.43

34 1273.01

35 1277.18

36 1287.57

37 1422.89

38 1426.50

39 1432.99

40 1437.94

41 1451.20

42 1471.18

43 1508.10

44 1516.71

45 1518.89

46 1523.09

47 1525.57

48 1531.57

49 1539.12

50 1541.60

51 1551.87

52 1555.58

53 1556.49

54 1558.39

55 3044.48

56 3046.00

57 3046.29

58 3048.71

59 3051.67

60 3060.92

61 3101.98

62 3103.56

63 3104.87

64 3107.48

65 3112.37

66 3115.10

67 3117.70

68 3124.80

69 3126.69

70 3127.61

71 3129.30

72 3133.89

C10H8

C 0.00000000 0.00000000 0.00000000

C -0.00000200 1.43259900 0.00000100

C -1.24457900 2.11838500 0.00000800

C -2.43365400 1.42481700 -0.00001800

C -2.43364900 0.00778500 -0.00004700

C -1.24457900 -0.68578700 -0.00001600

H -1.24019900 -1.77374800 -0.00004800

H -3.37824600 -0.52960300 -0.00005400

H -3.37825300 1.96219700 -0.00003900

H -1.24019500 3.20634600 0.00005800

C 1.24457700 2.11838800 -0.00002200

C 2.43364700 1.42481600 -0.00004500

C 2.43365100 0.00778300 -0.00001500

C 1.24457900 -0.68578600 0.00000100

H 1.24018700 -1.77374700 0.00004400

H 3.37825100 -0.52959700 -0.00002800

H 3.37824600 1.96220000 -0.00004300

H 1.24019900 3.20634900 -0.00006500

Mode Frequency (cm-1)

1 177.71

2 189.32

3 365.49

4 402.39

5 478.67

6 499.06

7 516.91

8 520.75

9 633.65

10 637.13

11 730.41

12 777.08

13 788.72

14 800.11

15 808.37

16 848.29

17 895.33

18 944.44

19 951.15

20 962.04

21 981.06

22 990.64

23 1047.60

24 1055.11

25 1155.61

26 1183.36

27 1186.52

28 1187.58

29 1241.88

30 1284.29

31 1297.94

32 1415.23

33 1420.44

34 1429.80

35 1506.95

36 1508.83

37 1567.38

38 1632.59

39 1661.31

40 1690.95

41 3176.07

42 3178.55

43 3180.36

44 3185.18

45 3193.49

46 3195.66

47 3207.59

48 3209.28

C11H10

C 0.00000000 0.00000000 0.00000000

C 0.51909500 1.41846100 0.00008800

C 1.92874300 1.68322600 0.00007700

C 2.90122300 0.64550300 0.00002400

C 4.24969900 0.92928900 -0.00000100

C 4.69886400 2.27030500 0.00000800

C 3.78550800 3.29988900 0.00003500

C 2.38856000 3.04199500 0.00004700

C 1.43987100 4.09996800 0.00000200

C 0.09398200 3.82490200 -0.00001700

C -0.35901400 2.48385100 0.00002400

H -1.42900100 2.28943200 0.00007200

H -0.63209400 4.63368000 -0.00007700

H 1.79914100 5.12657400 0.00001400

H 4.12180500 4.33439500 0.00001000

H 5.76457200 2.48319900 0.00000700

H 4.97413300 0.11898600 -0.00005200

H 2.57331400 -0.38929700 -0.00001600

H 0.34109500 -0.55863900 0.88091200

H 0.33887200 -0.55763800 -0.88242900

H -1.09404200 -0.01335000 0.00135500

Mode Frequency (cm-1)

1 134.60

2 171.44

3 187.77

4 252.47

5 283.05

6 420.91

7 443.78

8 481.51

9 483.17

10 520.59

11 550.33

12 578.29

13 637.39

14 714.83

15 750.16

16 793.50

17 803.99

18 813.32

19 873.66

20 876.93

21 911.41

22 955.53

23 975.98

24 990.76

25 1003.40

26 1056.24

27 1076.47

28 1085.95

29 1110.51

30 1179.93

31 1198.08

32 1200.59

33 1249.29

34 1274.75

35 1301.49

36 1394.88

37 1411.90

38 1441.82

39 1445.04

40 1486.75

41 1510.06

42 1515.98

43 1532.41

44 1566.91

45 1638.49

46 1660.08

47 1682.34

48 3039.46

49 3088.53

50 3127.22

51 3177.26

52 3179.08

53 3185.41

54 3189.98

55 3203.33

56 3205.01

57 3215.79

C12H10 (biphenyl)

C 0.00000000 0.00000000 0.00000000

C -0.72201600 1.13322800 0.41030900

C 0.00000000 2.26645600 0.82061800

C 1.39431700 2.26683400 0.82106600

C 2.09768900 1.13322800 0.41030900

C 1.39431700 -0.00037800 -0.00044800

H 1.93166100 -0.88523200 -0.33164900

H 3.18435300 1.13322800 0.41030900

H 1.93166100 3.15168800 1.15226700

H -0.53799600 3.14428100 1.16768500

C -2.20796600 1.13322800 0.41030900

C -2.92998200 0.00000000 0.82061800

C -4.32429900 -0.00037800 0.82106600

C -5.02767100 1.13322800 0.41030900

C -4.32429900 2.26683400 -0.00044800

C -2.92998200 2.26645600 0.00000000

H -2.39198600 3.14428100 -0.34706700

H -4.86164300 3.15168800 -0.33164900

H -6.11433500 1.13322800 0.41030900

H -4.86164300 -0.88523200 1.15226700

H -2.39198600 -0.87782500 1.16768500

H -0.53799600 -0.87782500 -0.34706700

Mode Frequency (cm-1)

1 78.52

2 92.68

3 135.65

4 270.86

5 314.54

6 371.63

7 418.56

8 425.88

9 505.41

10 560.91

11 625.65

12 631.16

13 643.32

14 716.43

15 717.56

16 756.65

17 758.18

18 795.77

19 868.84

20 870.48

21 923.54

22 940.08

23 974.63

24 977.68

25 996.45

26 997.63

27 1015.85

28 1020.16

29 1028.19

30 1064.83

31 1078.17

32 1114.15

33 1118.60

34 1194.12

35 1195.11

36 1215.50

37 1223.93

38 1313.11

39 1318.78

40 1350.25

41 1366.89

42 1377.46

43 1479.34

44 1507.57

45 1537.85

46 1559.59

47 1631.09

48 1646.10

49 1663.23

50 1664.80

51 3181.68

52 3182.48

53 3187.34

54 3189.70

55 3197.88

56 3201.53

57 3203.13

58 3206.45

59 3211.89

60 3213.69

C12H10 (acenaphthene)

c 0.78435121 -2.34296619 0.00173445

c -0.78548736 -2.34257403 -0.00070168

c -1.17571023 -0.87347768 -0.00075543

c -0.00001366 -0.09197771 0.00123120

c 1.17530399 -0.87405861 0.00258901

c 2.39610048 -0.23645265 0.00421746

c 2.42794524 1.18644310 0.00461320

c 1.27551280 1.95128578 0.00323744

c 0.00033702 1.32193438 0.00135435

c -1.27452935 1.95190823 -0.00066603

c -2.42733754 1.18763272 -0.00262169

c -2.39619794 -0.23527495 -0.00273392

h -3.33024100 -0.79205096 -0.00442843

h -3.39348089 1.68623353 -0.00421931

h -1.33948413 3.03745175 -0.00069718

h 1.34099048 3.03679594 0.00358970

h 3.39433762 1.68455984 0.00602650

h 3.32986875 -0.79369169 0.00517263

h -1.18706607 -2.86431293 0.87643050

h -1.18443537 -2.86354401 -0.87949004

h 1.18289311 -2.86455456 0.88035054

h 1.18582391 -2.86447427 -0.87557294

Mode Frequency (cm-1)

1 105.6712418

2 172.3366714

3 216.5237061

4 243.434676

5 422.751253

6 450.7110206

7 453.4172066

8 477.058729

9 508.2410017

10 549.5513497

11 572.3515603

12 632.2131526

13 646.8977693

14 665.1793942

15 759.6399206

16 774.4361396

17 802.7484021

18 813.0335309

19 839.7199361

20 863.3127791

21 882.0718191

22 905.7287592

23 950.5865105

24 959.28213

25 970.1905361

26 1015.017169

27 1038.8628

28 1045.92823

29 1073.271131

30 1109.223178

31 1173.92347

32 1182.513144

33 1196.818554

34 1242.57326

35 1252.115334

36 1257.806383

37 1259.452981

38 1287.777394

39 1322.645427

40 1403.157291

41 1408.095085

42 1462.580234

43 1481.262436

44 1499.773384

45 1517.860579

46 1524.828797

47 1548.861618

48 1650.5976

49 1654.445974

50 1675.876664

51 3049.697297

52 3059.645994

53 3074.359948

54 3093.590923

55 3174.201896

56 3175.179074

57 3185.405508

58 3187.485627

59 3199.794021

60 3201.627978

C13H10 (fluorene)

C 0.00000000 0.00000000 0.00000000

C -1.18443400 0.94615500 0.00004700

C -0.73491600 2.28311300 0.00002900

C -1.65167600 3.33690700 0.00002900

C -3.01695500 3.04379200 0.00006900

C -3.46174200 1.71716900 0.00010700

C -2.54482700 0.66000200 0.00009100

H -2.89688500 -0.36922400 0.00011700

H -4.52784200 1.50609900 0.00015300

H -3.74148100 3.85400400 0.00007100

H -1.31258700 4.36990100 0.00000800

C 0.73491900 2.28311200 0.00003000

C 1.18443600 0.94615300 0.00004600

C 2.54482800 0.66000200 0.00008500

C 3.46174500 1.71716800 0.00010100

C 3.01695800 3.04379200 0.00007500

C 1.65167900 3.33690600 0.00003900

H 1.31258800 4.36989900 0.00002700

H 3.74148300 3.85400500 0.00008500

H 4.52784400 1.50609700 0.00013400

H 2.89688900 -0.36922300 0.00011100

H -0.00000200 -0.65920500 0.87950200

H -0.00000200 -0.65897600 -0.87968100

Mode Frequency (cm-1)

1 101.06

2 141.05

3 220.87

4 245.29

5 278.99

6 420.88

7 427.97

8 444.80

9 482.98

10 498.55

11 552.36

12 577.34

13 636.70

14 643.54

15 711.94

16 746.52

17 757.82

18 761.02

19 802.78

20 817.24

21 853.49

22 878.07

23 886.41

24 929.24

25 941.23

26 977.76

27 980.34

28 983.52

29 1025.62

30 1058.57

31 1061.88

32 1124.42

33 1140.14

34 1164.49

35 1188.37

36 1193.42

37 1201.77

38 1214.87

39 1231.26

40 1267.59

41 1335.01

42 1344.54

43 1362.81

44 1393.15

45 1479.33

46 1495.81

47 1502.31

48 1527.24

49 1528.77

50 1637.86

51 1641.70

52 1666.62

53 1667.21

54 3033.90

55 3060.93

56 3179.03

57 3179.35

58 3186.27

59 3187.52

60 3196.28

61 3197.33

62 3208.21

63 3209.07

C13H12 (diphenylmethane)

C 0.00000000 0.00000000 0.00000000

C 1.27215600 -0.00011000 -0.83605400

C 1.85918200 1.20269400 -1.24920500

C 3.00756900 1.20552600 -2.04167200

C 3.59171000 -0.00020800 -2.43330200

C 3.02022100 -1.20580600 -2.02329300

C 1.87180400 -1.20282200 -1.23071000

H 1.43739900 -2.14748000 -0.91066700

H 3.47079800 -2.15059800 -2.31674200

H 4.48803800 -0.00019600 -3.04783700

H 3.44828500 2.15036400 -2.34959300

H 1.41473800 2.14761700 -0.94404700

C -1.27215100 -0.00296200 -0.83605900

C -1.87297300 1.19850400 -1.23266500

C -3.02141200 1.19910400 -2.02522600

C -3.59170400 -0.00770700 -2.43329900

C -3.00637000 -1.21224200 -2.03973600

C -1.85800500 -1.20702700 -1.24725200

H -1.41275600 -2.15104400 -0.94046900

H -3.44615700 -2.15801100 -2.34612300

H -4.48803100 -0.00957900 -3.04783200

H -3.47291500 2.14297300 -2.32021800

H -1.43938400 2.14408100 -0.91423200

H 0.00116100 -0.87829900 0.65664900

H -0.00116700 0.88098300 0.65300400

Mode Frequency (cm-1)

1 8.55

2 43.79

3 62.11

4 181.32

5 258.90

6 260.34

7 360.46

8 415.71

9 419.77

10 461.45

11 483.49

12 560.35

13 617.05

14 634.18

15 639.32

16 710.18

17 719.19

18 756.09

19 757.50

20 830.93

21 840.15

22 854.81

23 859.07

24 915.10

25 930.84

26 936.26

27 960.99

28 964.60

29 991.97

30 993.60

31 1017.84

32 1019.35

33 1059.03

34 1059.97

35 1098.95

36 1121.56

37 1183.63

38 1193.12

39 1193.18

40 1213.77

41 1214.13

42 1220.44

43 1226.22

44 1341.38

45 1350.82

46 1361.12

47 1367.87

48 1374.34

49 1499.76

50 1505.03

51 1509.82

52 1543.73

53 1547.77

54 1644.54

55 1645.83

56 1661.15

57 1667.88

58 3048.19

59 3088.95

60 3172.83

61 3174.10

62 3174.40

63 3176.87

64 3186.81

65 3187.87

66 3195.41

67 3196.03

68 3207.67

69 3208.10

C14H14 (bibenzyl)

C 0.00000000 0.00000000 0.00000000

C 1.48654500 0.00233300 -0.28199600

C 2.18786300 1.20626900 -0.43447000

C 3.55220300 1.21138000 -0.72711000

C 4.24190600 0.00648600 -0.87273100

C 3.55691500 -1.20042900 -0.72261800

C 2.19247600 -1.19933200 -0.42993200

H 1.66730700 -2.14464500 -0.30705700

H 4.08599300 -2.14424300 -0.82833200

H 5.30540500 0.00819800 -1.09660200

H 4.07778100 2.15676000 -0.83629000

H 1.65932300 2.15014800 -0.31495600

H -0.26757300 -0.88279400 0.59415700

H -0.26867400 0.87518500 0.60489400

C -0.85681500 0.00732600 -1.29232800

C -2.34336500 0.00572000 -1.01035400

C -3.04737500 1.20779900 -0.85633000

C -4.41178200 1.20964200 -0.56367800

C -5.09872900 0.00305800 -0.41963900

C -4.41098100 -1.20216500 -0.57132000

C -3.04660300 -1.19779900 -0.86397600

H -2.51957500 -2.14189900 -0.98824000

H -4.93805800 -2.14723900 -0.46682800

H -6.16223100 0.00193600 -0.19578000

H -4.93936500 2.15375900 -0.45328500

H -2.52068300 2.15288700 -0.97442500

H -0.58888200 0.88975600 -1.88688700

H -0.58849400 -0.86822700 -1.89682300

Mode Frequency (cm-1)

1 26.62

2 40.59

3 64.41

4 66.28

5 120.04

6 236.95

7 292.67

8 313.75

9 371.15

10 418.83

11 419.19

12 483.26

13 532.76

14 537.75

15 624.70

16 636.36

17 637.50

18 716.83

19 717.12

20 759.64

21 774.14

22 777.15

23 806.81

24 862.93

25 862.97

26 863.34

27 924.67

28 924.77

29 967.13

30 967.14

31 994.76

32 995.99

33 1006.28

34 1018.52

35 1018.60

36 1019.23

37 1061.02

38 1061.37

39 1096.94

40 1121.74

41 1170.31

42 1193.59

43 1193.73

44 1215.51

45 1215.80

46 1230.27

47 1231.33

48 1303.85

49 1305.32

50 1361.76

51 1362.04

52 1370.28

53 1375.03

54 1378.90

55 1501.28

56 1502.03

57 1510.97

58 1529.05

59 1548.71

60 1549.01

61 1645.03

62 1645.28

63 1666.28

64 1666.79

65 3041.48

66 3050.82

67 3073.82

68 3096.90

69 3172.60

70 3172.75

71 3173.85

72 3174.25

73 3186.46

74 3186.58

75 3196.40

76 3196.51

77 3208.19

78 3208.43

### Table S4. Optimized geometries (in XYZ format) and vibrational frequencies for reference species at the M06-2X/6-31+G(d,p) level of theory.

CH4

C 0.00000000 0.00000000 0.00000000

H -0.62854600 0.62854600 -0.62854600

H 0.62854600 -0.62854600 -0.62854600

H 0.62854600 0.62854600 0.62854600

H -0.62854600 -0.62854600 0.62854600

Mode Frequency (cm-1)

1 1209.32

2 1209.32

3 1349.33

4 1573.33

5 1573.33

6 3092.08

7 3092.08

8 3113.83

9 3234.38

C2H6

C 0.00000000 0.00000000 0.00000000

C -1.52601700 -0.00173600 -0.00439100

H -1.92240900 0.81404200 -0.61467200

H -1.92048200 -0.94577800 -0.38855300

H -1.91697900 0.13166500 1.00938700

H 0.39449600 0.94384700 0.38461600

H 0.39637400 -0.81609100 0.60986800

H 0.39095500 -0.13282000 -1.01386000

Mode Frequency (cm-1)

1 314.50

2 869.15

3 913.49

4 1030.19

5 1244.63

6 1277.49

7 1477.90

8 1506.24

9 1514.01

10 1528.62

11 1555.06

12 1560.78

13 3032.78

14 3034.21

15 3100.77

16 3115.20

17 3121.51

18 3134.66

*i-*C4H10

C 0.00000000 0.00000000 0.00000000

C 1.33327200 0.57516100 -0.47778100

C 2.49976700 -0.29130900 -0.00021500

H 2.39891100 -1.32256100 -0.35200600

H 3.45799500 0.09861200 -0.35740200

H 2.53386300 -0.31263300 1.09549000

C 1.50221000 2.01812000 0.00010800

H 0.68185500 2.65136700 -0.35115200

H 1.51065400 2.05793800 1.09574600

H 2.44163700 2.45006300 -0.35940000

H 1.33358800 0.57564300 -1.57595700

H -0.84138300 0.60291100 -0.35384200

H -0.14382700 -1.02507800 -0.35477500

H -0.03469700 -0.01653500 1.09575100

Mode Frequency (cm-1)

1 205.27

2 276.58

3 293.09

4 371.20

5 380.56

6 444.28

7 823.41

8 932.62

9 933.66

10 960.29

11 990.66

12 995.64

13 1204.09

14 1206.27

15 1216.47

16 1362.68

17 1363.71

18 1414.46

19 1415.80

20 1439.59

21 1490.23

22 1493.04

23 1499.28

24 1517.27

25 1517.74

26 1525.30

27 3019.99

28 3040.54

29 3045.34

30 3049.78

31 3113.38

32 3117.33

33 3122.73

34 3128.39

35 3133.40

36 3135.97

*i-*C4H9 

C 0.00000000 0.00000000 0.00000000

C -0.03281600 -1.48023600 0.19491600

C -1.33750000 -2.17941800 0.00094600

H -2.15652600 -1.60867000 0.45164700

H -1.59331100 -2.28971400 -1.06679700

H -1.33413400 -3.18974600 0.42384000

C 1.24371800 -2.23359500 0.00044900

H 1.17537800 -3.25967000 0.37614600

H 1.51702700 -2.30454700 -1.06942700

H 2.07691400 -1.72772900 0.49776800

H -0.87636000 0.49570200 0.43217400

H 0.89221700 0.44712000 0.44959800

H 0.01198300 0.27714500 -1.06891100

Mode Frequency (cm-1)

1 157.13

2 217.75

3 264.49

4 284.34

5 354.32

6 378.74

7 779.46

8 928.94

9 947.42

10 951.71

11 1017.49

12 1018.56

13 1126.87

14 1303.84

15 1308.32

16 1385.84

17 1400.72

18 1472.69

19 1488.23

20 1509.40

21 1513.04

22 1522.39

23 1529.28

24 1546.18

25 2944.81

26 2954.29

27 2975.64

28 3043.54

29 3051.67

30 3090.53

31 3095.50

32 3121.84

33 3143.30

C6H6

C 0.00000000 0.00000000 0.00000000

C -0.89867600 1.06519800 0.00028800

C -2.27463400 0.83870100 -0.00002100

C -2.76570100 -0.46619100 -0.00046400

C -1.86723300 -1.53161400 -0.00068800

C -0.49089300 -1.30503500 -0.00037600

H 0.18833300 -2.15262200 -0.00018700

H -2.23922300 -2.55299800 -0.00141400

H -3.83311800 -0.66288700 -0.00086400

H -2.95388900 1.68659100 -0.00006400

H -0.52691700 2.08657200 0.00115900

H 1.06733200 0.19687800 0.00050000

Mode Frequency (cm-1)

1 373.44

2 396.67

3 556.92

4 611.70

5 629.45

6 693.92

7 729.80

8 809.50

9 885.36

10 945.86

11 949.39

12 1012.67

13 1031.10

14 1069.04

15 1089.67

16 1188.14

17 1202.73

18 1248.69

19 1347.18

20 1413.85

21 1521.28

22 1571.80

23 1667.21

24 1699.56

25 3093.99

26 3095.98

27 3174.43

28 3175.53

29 3222.87

30 3225.16

C7H8

C 0.00000000 0.00000000 0.00000000

C -1.50826400 0.00509300 0.00000000

C -2.22008400 -1.19996900 0.00000000

C -3.61200800 -1.20983500 0.00000000

C -4.32138700 -0.00835500 0.00000000

C -3.62500700 1.19734700 0.00000000

C -2.22987800 1.20080200 0.00000000

H -1.69366900 2.14665100 0.00000000

H -4.16586900 2.13903800 0.00000000

H -5.40676200 -0.01414600 0.00000000

H -4.14480100 -2.15615900 0.00000000

H -1.67376800 -2.14066700 0.00000000

H 0.39932000 1.01692800 0.00000000

H 0.39005700 -0.51689900 0.88239600

H 0.39005700 -0.51689900 -0.88239600

Mode Frequency (cm-1)

1 23.04

2 211.15

3 342.76

4 413.71

5 473.37

6 526.64

7 631.22

8 710.34

9 750.56

10 807.88

11 872.29

12 926.82

13 1000.97

14 1002.62

15 1019.40

16 1019.41

17 1064.26

18 1066.37

19 1119.63

20 1176.67

21 1206.15

22 1250.05

23 1340.76

24 1356.93

25 1418.91

26 1481.73

27 1493.37

28 1514.69

29 1548.11

30 1671.23

31 1695.79

32 3061.98

33 3128.95

34 3150.86

35 3188.98

36 3193.28

37 3207.28

38 3214.34

39 3228.04

C7H7 

C 0.00000000 0.00000000 0.00000000

C 1.41775900 -0.00004600 -0.00079700

C 2.15112200 -1.21225700 -0.00051600

C 3.53787500 -1.20818700 -0.00020700

C 4.24167900 -0.00038700 -0.00068600

C 3.53831100 1.20761800 -0.00159500

C 2.15150600 1.21201700 -0.00147100

H 1.61158700 2.15387500 -0.00057700

H 4.07745000 2.14913800 0.00074900

H 5.32642000 -0.00076700 0.00175100

H 4.07643000 -2.14975300 -0.00075800

H 1.61048900 -2.15400800 -0.00250100

H -0.55435200 -0.92942200 -0.00594100

H -0.55403700 0.92947000 0.00441200

Mode Frequency (cm-1)

1 207.57

2 351.08

3 403.31

4 489.16

5 504.27

6 530.74

7 625.79

8 700.78

9 742.11

10 802.33

11 840.46

12 892.27

13 954.22

14 980.57

15 998.62

16 1028.58

17 1043.20

18 1058.46

19 1131.63

20 1184.27

21 1195.91

22 1273.13

23 1333.26

24 1362.37

25 1494.41

26 1497.02

27 1521.02

28 1634.85

29 1642.53

30 3197.43

31 3200.22

32 3202.32

33 3216.52

34 3220.31

35 3239.35

36 3303.16

C8H18

C 0.00000000 0.00000000 0.00000000

C -1.57103500 0.00107800 0.00382900

C -2.11946200 -1.29666400 0.62422800

H -1.71898000 -1.46249200 1.62955700

H -3.20904700 -1.22630000 0.71789100

H -1.88443400 -2.16451700 0.00175700

C -2.12638700 1.18222100 0.81179400

H -1.91982500 1.08977200 1.88185400

H -1.70599500 2.13836600 0.48190000

H -3.21137900 1.24383900 0.67700100

C -2.13241200 0.10399200 -1.42151300

H -1.75275100 -0.69038200 -2.07391200

H -3.22334800 0.00772500 -1.39532000

H -1.88735900 1.06602300 -1.88339900

C 0.55417700 -1.34280300 -0.50936900

H 1.63571800 -1.26542800 -0.65846000

H 0.35951600 -2.14271600 0.21094300

H 0.11290100 -1.61827300 -1.47209300

C 0.56208100 1.10717300 -0.90461500

H 1.64972700 1.15804000 -0.78658300

H 0.33843000 0.93620100 -1.96165900

H 0.16608000 2.09645600 -0.64790700

C 0.56157600 0.22287800 1.41476600

H 1.64708100 0.07751300 1.40392700

H 0.35834900 1.23617000 1.77374700

H 0.14758500 -0.48056100 2.14364400

Mode Frequency (cm-1)

1 104.14

2 221.86

3 258.97

4 278.47

5 290.56

6 298.19

7 313.85

8 326.03

9 342.92

10 356.88

11 376.15

12 396.60

13 399.84

14 411.17

15 475.50

16 476.33

17 508.93

18 669.43

19 823.22

20 904.23

21 921.49

22 935.67

23 944.28

24 948.03

25 951.85

26 966.18

27 1015.58

28 1020.49

29 1053.03

30 1063.29

31 1204.76

32 1214.22

33 1226.39

34 1279.14

35 1292.27

36 1307.78

37 1379.40

38 1380.87

39 1391.26

40 1400.61

41 1416.87

42 1428.24

43 1468.15

44 1484.97

45 1488.55

46 1491.31

47 1500.11

48 1504.59

49 1513.58

50 1534.09

51 1539.50

52 1541.85

53 1549.23

54 1553.20

55 3013.54

56 3017.73

57 3023.89

58 3026.24

59 3029.77

60 3036.06

61 3095.34

62 3098.19

63 3102.00

64 3108.47

65 3111.91

66 3112.85

67 3128.65

68 3130.83

69 3134.25

70 3137.10

71 3138.89

72 3150.19

C10H8

C 0.00000000 0.00000000 0.00000000

C 0.00000400 1.42378800 0.00000000

C -1.24361100 2.11284000 0.00002300

C -2.42846000 1.42118700 -0.00000800

C -2.42846200 0.00260200 -0.00004900

C -1.24361600 -0.68905400 -0.00002400

H -1.23834700 -1.77550100 -0.00004600

H -3.37240700 -0.53122400 -0.00009200

H -3.37240100 1.95501900 -0.00003100

H -1.23834600 3.19928700 0.00004800

C 1.24362400 2.11284000 -0.00003400

C 2.42846800 1.42118500 -0.00004800

C 2.42846600 0.00259600 -0.00000700

C 1.24361700 -0.68905400 0.00001300

H 1.23834500 -1.77550100 0.00003900

H 3.37240800 -0.53123500 -0.00000800

H 3.37241200 1.95501100 -0.00007200

H 1.23835600 3.19928800 -0.00005800

Mode Frequency (cm-1)

1 184.61

2 190.40

3 369.68

4 399.43

5 480.93

6 493.74

7 513.13

8 518.51

9 627.07

10 636.00

11 777.13

12 777.15

13 786.27

14 802.19

15 844.99

16 890.83

17 928.79

18 942.24

19 1008.31

20 1024.95

21 1043.93

22 1046.36

23 1049.57

24 1061.50

25 1162.21

26 1168.63

27 1186.17

28 1197.68

29 1242.67

30 1277.27

31 1296.36

32 1406.21

33 1428.81

34 1433.87

35 1505.84

36 1512.71

37 1573.99

38 1656.50

39 1678.97

40 1715.81

41 3203.60

42 3203.96

43 3206.58

44 3208.14

45 3223.37

46 3223.45

47 3235.89

48 3236.79

C11H10

C 0.00000000 0.00000000 0.00000000

C 0.49811300 1.42141600 0.00008800

C 1.90497800 1.69462200 0.00009700

C 2.87668200 0.65586900 0.00004100

C 4.22066800 0.94157300 -0.00002200

C 4.66636100 2.28537800 -0.00002000

C 3.75282600 3.30966300 0.00002900

C 2.35657600 3.04517000 0.00007000

C 1.40473500 4.10157000 0.00002000

C 0.06386900 3.82163600 -0.00003000

C -0.38413400 2.47672600 -0.00000400

H -1.45195600 2.27602500 -0.00000700

H -0.66386600 4.62685900 -0.00010400

H 1.76195900 5.12801400 0.00004000

H 4.08557200 4.34447800 0.00003000

H 5.72996000 2.50080500 -0.00003400

H 4.94598300 0.13417800 -0.00009200

H 2.54619100 -0.37792700 0.00003700

H 0.34932600 -0.54589200 0.88190900

H 0.34858300 -0.54534700 -0.88255200

H -1.09135100 -0.02303900 0.00043900

Mode Frequency (cm-1)

1 139.07

2 182.10

3 217.54

4 271.24

5 282.17

6 424.36

7 442.06

8 481.90

9 482.84

10 517.90

11 551.91

12 573.25

13 640.51

14 717.40

15 764.20

16 793.96

17 801.16

18 828.37

19 873.41

20 902.32

21 947.69

22 1002.78

23 1004.52

24 1017.13

25 1034.78

26 1053.26

27 1065.19

28 1085.11

29 1104.39

30 1167.01

31 1177.71

32 1186.67

33 1236.55

34 1266.57

35 1291.57

36 1387.51

37 1417.91

38 1431.92

39 1438.45

40 1476.57

41 1503.45

42 1506.64

43 1513.06

44 1571.15

45 1665.98

46 1678.30

47 1710.74

48 3045.12

49 3103.53

50 3153.64

51 3155.88

52 3170.10

53 3182.05

54 3202.62

55 3206.96

56 3226.15

57 3240.15

C12H10 (biphenyl)

C 0.00000000 0.00000000 0.00000000

C -0.71509600 1.13627800 0.39580800

C 0.00000000 2.27255600 0.79161600

C 1.39407900 2.27421600 0.78972400

C 2.09428500 1.13627800 0.39580800

C 1.39407900 -0.00166000 0.00189200

H 1.91538100 -0.89695300 -0.32254200

H 3.18093500 1.13627800 0.39580800

H 1.91538100 3.16950900 1.11415800

H -0.52551100 3.16003300 1.13258900

C -2.19939200 1.13627800 0.39580800

C -2.91448800 0.00000000 0.79161600

C -4.30856700 -0.00166000 0.78972400

C -5.00877300 1.13627800 0.39580800

C -4.30856700 2.27421600 0.00189200

C -2.91448800 2.27255600 0.00000000

H -2.38897700 3.16003300 -0.34097300

H -4.82986900 3.16950900 -0.32254200

H -6.09542300 1.13627800 0.39580800

H -4.82986900 -0.89695300 1.11415800

H -2.38897700 -0.88747700 1.13258900

H -0.52551100 -0.88747700 -0.34097300

Mode Frequency (cm-1)

1 79.93

2 85.70

3 139.79

4 267.36

5 316.65

6 370.05

7 416.60

8 424.23

9 506.57

10 566.01

11 608.75

12 622.06

13 633.75

14 701.74

15 706.66

16 747.73

17 752.80

18 785.70

19 911.87

20 914.60

21 931.15

22 946.64

23 1004.66

24 1015.45

25 1031.22

26 1032.15

27 1037.93

28 1043.84

29 1044.02

30 1094.12

31 1103.72

32 1105.67

33 1107.06

34 1166.56

35 1176.39

36 1224.51

37 1242.12

38 1313.88

39 1336.53

40 1342.33

41 1363.42

42 1371.79

43 1463.73

44 1489.37

45 1546.53

46 1579.51

47 1649.99

48 1668.80

49 1686.99

50 1694.21

51 3102.46

52 3102.52

53 3154.44

54 3154.60

55 3157.61

56 3158.09

57 3173.86

58 3174.16

59 3176.11

60 3176.96

C12H10 (acenaphthene)

C 0.00000000 0.00000000 0.00000000

C -1.56307000 0.00291400 0.01439000

C -1.95163600 1.46921900 0.00788900

C -0.77733100 2.25289200 0.00721300

C 0.39495300 1.46560200 0.00661900

C 1.61388700 2.09680500 0.00800900

C 1.64657000 3.52139800 0.00920500

C 0.50033000 4.28766800 0.00836300

C -0.77619400 3.65925900 0.00719200

C -2.05120200 4.29085200 0.00605500

C -3.19891900 3.52708700 0.00530300

C -3.16900800 2.10261300 0.00656400

H -4.10131500 1.54653200 0.00696000

H -4.16385700 4.02305500 0.00426600

H -2.11591000 5.37498500 0.00575100

H 0.56667500 5.37201800 0.00873700

H 2.61201800 4.01832900 0.01035600

H 2.54561600 1.54007500 0.00763300

H -1.95374400 -0.50153700 0.90354300

H -1.97287100 -0.51883100 -0.85597300

H 0.40715700 -0.52299700 0.86974500

H 0.38929400 -0.50537200 -0.88831400

Mode Frequency (cm-1)

1 58.58

2 173.10

3 215.22

4 233.97

5 419.55

6 448.68

7 450.32

8 476.76

9 507.02

10 549.78

11 565.85

12 632.93

13 653.17

14 663.03

15 756.56

16 800.17

17 809.69

18 825.78

19 835.14

20 865.08

21 929.86

22 955.14

23 965.69

24 1020.46

25 1030.02

26 1035.31

27 1036.27

28 1040.60

29 1072.39

30 1109.05

31 1174.27

32 1177.54

33 1206.33

34 1238.04

35 1239.11

36 1249.83

37 1253.55

38 1292.82

39 1306.35

40 1395.57

41 1411.08

42 1463.10

43 1467.29

44 1481.11

45 1497.58

46 1524.28

47 1559.48

48 1673.02

49 1683.19

50 1700.79

51 3047.31

52 3059.36

53 3086.55

54 3104.89

55 3197.00

56 3199.09

57 3202.53

58 3204.41

59 3226.26

60 3235.95

C13H10 (fluorene)

C 0.00000000 0.00000000 0.00000000

C -1.18128500 0.94454100 0.00002800

C -0.73601800 2.27779500 0.00001000

C -1.64814600 3.33140600 0.00001500

C -3.01168500 3.03753300 0.00005900

C -3.45489000 1.71210100 0.00009400

C -2.53994600 0.65617400 0.00007100

H -2.89072600 -0.37243900 0.00009300

H -4.51958600 1.50183000 0.00014200

H -3.73633500 3.84556500 0.00007100

H -1.30632600 4.36264100 -0.00000500

C 0.73601700 2.27779500 0.00001200

C 1.18128400 0.94454200 0.00002800

C 2.53994500 0.65617500 0.00006600

C 3.45489100 1.71210100 0.00008700

C 3.01168500 3.03753200 0.00006700

C 1.64814600 3.33140600 0.00002800

H 1.30632700 4.36264100 0.00001600

H 3.73633600 3.84556500 0.00008600

H 4.51958600 1.50182800 0.00011900

H 2.89072700 -0.37243700 0.00009000

H 0.00000000 -0.64868300 0.88306200

H 0.00000200 -0.64851700 -0.88318900

Mode Frequency (cm-1)

1 109.98

2 145.71

3 210.88

4 258.11

5 283.36

6 420.79

7 428.29

8 446.22

9 488.59

10 495.81

11 549.51

12 582.51

13 627.90

14 639.23

15 715.07

16 756.99

17 757.39

18 781.35

19 814.38

20 821.75

21 853.48

22 902.62

23 914.76

24 954.44

25 989.43

26 999.77

27 1022.27

28 1027.71

29 1029.05

30 1057.38

31 1058.44

32 1116.27

33 1134.57

34 1168.59

35 1169.04

36 1170.08

37 1196.33

38 1215.01

39 1234.38

40 1268.44

41 1324.10

42 1328.14

43 1350.64

44 1374.07

45 1458.05

46 1489.89

47 1492.15

48 1526.03

49 1531.50

50 1651.80

51 1659.13

52 1686.55

53 1690.09

54 3057.74

55 3097.04

56 3157.71

57 3157.97

58 3167.82

59 3168.01

60 3206.69

61 3206.81

62 3240.13

63 3240.27
